# Supplementary material for: High Affinity Antibodies against Influenza Characterize the Plasmablast Response in SLE Patients After Vaccination
Source: PubMed Central journal article supplement (PMC4423960; doi:10.1371/journal.pone.0125618), 2015-05-07
Supplement: pone.0125618.s004.pdf [file pone.0125618.s004.pdf]

**S1 Table.** Information on the 10 SLE patients and 8 controls from whom plasmablasts were isolated 7 days after influenza vaccination and antibodies were generated

|                     | Subject | Age | Sex <sup>a</sup> | Race <sup>b</sup> | Leuko-/<br>Lympho-penic <sup>c</sup> | ACR <sup>d</sup> | ANA <sup>e</sup> | Pattern <sup>f</sup> | dsDNA | Ro <sup>g</sup> | La <sup>g</sup> | nRNP <sup>g</sup> | UIL <sup>h</sup> | Rf <sup>i</sup> | Immunosuppressive therapy                                           |
|---------------------|---------|-----|------------------|-------------------|--------------------------------------|------------------|------------------|----------------------|-------|-----------------|-----------------|-------------------|------------------|-----------------|---------------------------------------------------------------------|
| <b>SLE patients</b> | S1      | 47  | M                | W                 | Y / Y                                | 8                | 360              | NS                   | -     | +               | -               | +                 | -                | -               | Prednisone, Hydroxychloroquine, Mycophenolate mofetil               |
|                     | S2      | 33  | F                | W                 | N / Y                                | 6                | 1080             | NS                   | -     | +               | -               | +                 | -                | -               | Prednisone, Hydroxychloroquine, Mycophenolate mofetil, Methotrexate |
|                     | S3      | 48  | M                | W                 | Y / Y                                | 5                | 1080             | NH                   | -     | +               | +               | -                 | -                | -               | Prednisone, Hydroxychloroquine                                      |
|                     | S4      | 44  | F                | W                 | N / N                                | 8                | 120              | NH                   | +     | -               | -               | -                 | -                | +               | Hydroxychloroquine                                                  |
|                     | S5      | 43  | F                | W                 | Y / N                                | 7                | 120              | NS                   | -     | -               | -               | -                 | -                | -               | Prednisone                                                          |
|                     | S6      | 45  | M                | AA                | N / N                                | 5                | 120              | NH                   | -     | -               | -               | -                 | -                | -               | Prednisone, Methotrexate                                            |
|                     | S7      | 31  | F                | W                 | N / N                                | 6                | 180              | NH                   | +     | -               | -               | -                 | -                | -               | Prednisone, Hydroxychloroquine, Mycophenolate mofetil               |
|                     | S8      | 50  | F                | W                 | Y / Y                                | 6                | 3240             | NH                   | +     | +               | -               | -                 | -                | -               | Prednisone, Hydroxychloroquine, Azathioprine                        |
|                     | S9      | 34  | F                | W                 | N / N                                | 4                | 360              | NH                   | -     | +               | -               | -                 | -                | -               | Hydroxychloroquine                                                  |
|                     | S10     | 51  | F                | AA                | Y / Y                                | 10               | 1080             | NS                   | -     | -               | -               | -                 | +                | -               | Prednisone, Hydroxychloroquine, Mycophenolate mofetil               |
| <b>Controls</b>     | C1      | 44  | M                | AA                |                                      |                  |                  |                      |       |                 |                 |                   |                  |                 |                                                                     |
|                     | C2      | 30  | F                | W                 |                                      |                  |                  |                      |       |                 |                 |                   |                  |                 |                                                                     |
|                     | C3      | 29  | F                | W                 |                                      |                  |                  |                      |       |                 |                 |                   |                  |                 |                                                                     |
|                     | C4      | 43  | F                | W                 |                                      |                  |                  |                      |       |                 |                 |                   |                  |                 |                                                                     |
|                     | C5      | 39  | F                | W                 |                                      |                  |                  |                      |       |                 |                 |                   |                  |                 |                                                                     |
|                     | C6      | 29  | F                | W                 |                                      |                  |                  |                      |       |                 |                 |                   |                  |                 |                                                                     |
|                     | C7      | 51  | M                | W                 |                                      |                  |                  |                      |       |                 |                 |                   |                  |                 |                                                                     |
|                     | C8      | 47  | F                | W                 |                                      |                  |                  |                      |       |                 |                 |                   |                  |                 |                                                                     |

<sup>a</sup>Male (M), Female (F). <sup>b</sup>Western European descent(W), African-American (AA) <sup>c</sup> Yes(Y), No (N) <sup>d</sup>American College of Rheumatology Criteria for Classification of Systemic Lupus Erythematosus <sup>e</sup>Anti-nuclear antigen (ANA) Titer (1/X) <sup>f</sup>NS: nuclear speckled; NH: nuclear homogenous <sup>g</sup>Autoantibodies against ribonuclearproteins by immunodiffusion <sup>h</sup>UIL (unidentified Line) in which autoantibody specificities are unknown <sup>i</sup>Rheumatoid Factor (anti-IgG)
