# Supplementary material for: High Affinity Antibodies against Influenza Characterize the Plasmablast Response in SLE Patients After Vaccination
Source: PubMed Central journal article supplement (PMC4423960; doi:10.1371/journal.pone.0125618), 2015-05-07
Supplement: pone.0125618.s005.pdf [file pone.0125618.s005.pdf]

**S2 Table.** Repertoire and reactivity of all antibodies expressed from SLE patients (206 antibodies) and controls (240 antibodies)

| Subject | Antibody | VH     | JH                       | CDR3 (AA)                    | CDR3 Length (#) | #mutations | VK    | JK             | CDR3 (AA)  | CDR3 Length (#) | #mutations | dsDNA | Insulin | LPS | Hep-2 | Virus   | Approx KD(M) <sup>a</sup> | rHA | HAI | MN |
|---------|----------|--------|--------------------------|------------------------------|-----------------|------------|-------|----------------|------------|-----------------|------------|-------|---------|-----|-------|---------|---------------------------|-----|-----|----|
| S1      | 2.AO6    | 3-23   | 4                        | AKFHFYGSIGPEY                | 14              | 9          | 3-20  | 5              | QQRDSSSIT  | 9               | 4          | /     | /       | /   | X     | /       |                           | /   | /   | /  |
|         | 2.BO6    | 3-73   | 4                        | FILPGYAMPR                   | 10              | 16         | 3-20  | 5              | QQYAGSPFIT | 10              | 9          | X     | X       | X   | X     | X       | 3.0E-07                   | /   | /   | /  |
|         | 2.EO4    | 3-30-3 | 3                        | AALKLPIGYSFDI                | 13              | 28         | 1D-17 | 1              | LQYNTYPWT  | 9               | 9          | /     | /       | /   | /     | X       | 1.3E-10                   | /   | /   | /  |
|         | 2.FO4    | 3-53   | 3                        | ATGGALGHRIYYDI<br>NGSQNFGFDV | 24              | 40         | 1-16  | 4              | QQYGSYPLT  | 9               | 16         | /     | /       | /   | X     | /       |                           | /   | /   | /  |
|         | 2.GO5    | 3-07   | 4                        | LRGGWHPDY                    | 9               | 18         | 3-15  | 4              | QQYNNWPRT  | 9               | 8          | /     | /       | /   | /     | /       |                           | /   | /   | /  |
|         | 3.AO5    | 3-73   | 4                        | IRQKGDTEMVIFDS               | 14              | 29         | 1-5   | 1              | HQYFGPSTAT | 10              | 17         | /     | /       | /   | X     | X       | 2.6E-10                   | /   | /   | /  |
|         | 3.EO1    | 3-11   | 5                        | ARRSNSAIPWFFDS               | 14              | 21         | 3-15  | 4              | QQYNNWPLT  | 9               | 8          | /     | X       | /   | X     | X       | 1.5E-07                   | /   | /   | /  |
|         | 3.EO5*   | 4-31   | 4                        | ARGMLMDTDMIAF<br>DQ          | 15              | 30         | 2-28  | 4              | MQGIETPPT  | 9               | 13         | /     | /       | /   | /     | X       | 3.5E-10                   | X   | X   | X  |
|         | 3.FO6*   | 4-31   | 4                        | ARGMLLDTDMIAFD<br>H          | 15              | 25         | 2-28  | 4              | MQALQAPPT  | 9               | 11         | /     | /       | /   | /     | X       | 2.5E-10                   | X   | X   | X  |
|         | 3.2AO4   | 3-49   | 3                        | SKGGEGDAFDI                  | 11              | 24         | 1-33  | 2              | QQCVSLPYT  | 9               | 24         | /     | /       | /   | /     | X       | 1.4E-09                   | X   | X   | X  |
|         | 3.2AO5   | 5-a    | 5                        | ARHYWVGSNWFS<br>AS           | 14              | 10         | 1-5   | 2              | QQYNTYPCS  | 9               | 11         | /     | /       | /   | X     | /       |                           | /   | /   | /  |
|         | 3.2AO6   | 3-15   | 4                        | ATDRGDYYGSGTIT<br>GFLWVY     | 20              | 35         | 3-20  | 4              | QQCGRSPPT  | 9               | 9          | /     | /       | /   | /     | X       | 2.9E-09                   | X   | X   | X  |
|         | 3.3BO6*  | 4-31   | 4                        | ARGMLMDTDMIAF<br>DL          | 15              | 29         | 2-28  | 4              | MQDIQAPPT  | 9               | 15         | /     | /       | /   | /     | X       | 4.5E-08                   | /   | /   | /  |
|         | 3.3DO6   | 4-34   | 4                        | ARQGNPHSSPLDY                | 13              | 34         | 1D-39 | 1              | QQTDSTPHT  | 9               | 20         | /     | /       | /   | /     | X       | 2.1E-10                   | /   | /   | /  |
| 3.3GO3  | 1-69     | 6      | ARSTYSGNFPRYY<br>YYHGLDV | 20                           | 19              | 3-20       | 1     | QQYGNSPPW<br>T | 10         | 11              | /          | /     | /       | /   | X     | 1.6E-07 | X                         | /   | X   |    |
| S2      | 1.EO2    | 5-51   | 3                        | ARQKYCSGGSCFG<br>WHDAFDV     | 20              | 11         | 3-11  | 1              | QQYGSSPPT  | 9               | 20         | /     | /       | /   | X     | X       | 1.3E-06                   | /   | /   | /  |

|         |      |   |                           |    |    |       |   |                 |    |    |   |   |   |   |   |         |   |   |   |
|---------|------|---|---------------------------|----|----|-------|---|-----------------|----|----|---|---|---|---|---|---------|---|---|---|
| 1.EO4   | 3-30 | 3 | ARESGFCADDCAR<br>YAFDV    | 18 | 27 | 3-11  | 4 | QHREKWPPG<br>AT | 11 | 22 | / | / | / | / | / |         | / | / | / |
| 1.EO5   | 3-30 | 4 | AKSGSFFGFDY               | 11 | 16 | 2D-29 | 4 | MQSLQFPLT       | 9  | 8  | / | / | / | X | / |         | / | / | / |
| 1.FO4   | 4-39 | 5 | ARYALFDSGKNWF<br>DP       | 15 | 32 | 3-15  | 2 | QQYSNWPLCS      | 10 | 7  | X | / | X | X | / |         | / | / | / |
| 1.GO1*  | 3-66 | 6 | ARDRYSDGLGYYY<br>YYYYGMDV | 21 | 20 | 3-11  | 2 | QHRFHWPQG<br>S  | 10 | 14 | / | / | / | / | X | 7.2E-09 | X | X | X |
| 1.2BO1* | 3-66 | 6 | ARDRYFDSAGRY<br>YYYYGMDV  | 21 | 18 | 3-11  | 2 | QHRWRWPLC<br>S  | 10 | 13 | / | / | / | / | X | 7.7E-07 | X | / | / |
| 1.2BO2  | 1-69 | 3 | ARYDYGGNSIFINP<br>FDM     | 17 | 27 | 3-15  | 2 | QQYNTWPSS       | 9  | 6  | / | / | / | / | X | 2.7E-09 | X | / | X |
| 1.2CO1  | 4-39 | 3 | ARVGGSAAWKGGG<br>ADAFDF   | 18 | 12 | 3-11  | 4 | QQRSNWPSLT      | 10 | 2  | / | / | / | / | X | 5.6E-09 | X | / | X |
| 1.2CO3  | 4-39 | 6 | ARAREGYNYLYGM<br>DV       | 15 | 11 | 1-9   | 2 | QHLDTWPRS       | 9  | 8  | / | / | / | / | X | 1.6E-09 | X | / | / |
| 1.2EO3  | 1-69 | 4 | ARWGGDASNRDF<br>WSPFDF    | 19 | 24 | 3-20  | 4 | QQYGTSLP        | 8  | 14 | / | / | / | / | / |         | / | / | / |
| 1.2EO5  | 4-59 | 4 | ASGSDNGYMERRA<br>YYLDN    | 18 | 22 | 3-20  | 3 | QRYGTSPKFT      | 10 | 11 | / | / | / | / | X | 1.3E-08 | X | / | / |
| 1.2FO3  | 4-39 | 6 | ARQRAGWHYLYG<br>MDV       | 15 | 19 | 1-27  | 1 | QMYTGAPPWT      | 10 | 13 | / | / | / | / | X | 1.8E-09 | X | / | / |
| 1.2GO1  | 3-53 | 6 | ARDRYDASGYYY<br>YYYGMDV   | 20 | 21 | 3-11  | 2 | QHRVKWPLCS      | 10 | 19 | / | / | / | / | X | 3.3E-07 | X | / | / |
| 1.2GO5  | 4-34 | 3 | ANQRRGYNSGYYY<br>GPDAFDI  | 20 | 18 | 1-5   | 1 | QQYDNYPWT       | 9  | 9  | / | / | / | / | / |         | / | / | / |
| 2.BO4   | 1-02 | 4 | ARSYDMRVVTVVS<br>TGFDY    | 18 | 22 | 1-17  | 1 | LQLNTYPWT       | 9  | 6  | / | / | / | X | X | 1.6E-09 | X | / | X |
| 2.CO1*  | 3-66 | 6 | ARDRYDASGYYY<br>YYYGMDV   | 20 | 28 | 3-11  | 2 | QHCFNWPMC<br>S  | 10 | 17 | / | / | / | / | X | 4.9E-08 | X | X | X |
| 2.CO4   | 1-69 | 4 | AGTRGYYGDYEPF<br>DY       | 15 | 22 | 3-20  | 4 | QQYGSSPRT       | 9  | 5  | X | / | / | X | X | 1.7E-09 | X | / | X |
| 2.EO3   | 3-48 | 3 | ARGKAGGSYLSDD<br>ALDI     | 17 | 21 | 1-5   | 1 | QQYESYPWT       | 9  | 9  | / | / | / | / | X | 1.8E-09 | X | X | X |
| 2.EO6   | 4-34 | 3 | ATGRYSPNYFGSG<br>SLAHAFDI | 21 | 11 | 1-39  | 4 | QQSYSTLALT      | 10 | 8  | / | / | / | X | X | 2.1E-07 | X | / | / |
| 2.FO1   | 4-31 | 6 | AREQYSGYEGGW<br>GYYYYGMDV | 21 | 2  | 1D-39 | 2 | QQSYSTPRT       | 9  | 4  | / | / | / | X | X | 7.7E-07 | / | / | / |

|    |         |      |   |                             |    |    |      |   |            |    |    |   |   |   |   |   |         |   |   |   |
|----|---------|------|---|-----------------------------|----|----|------|---|------------|----|----|---|---|---|---|---|---------|---|---|---|
|    | 2.FO3   | 3-30 | 6 | AKNSLPQYDDYRM<br>EHPYFYGMDV | 23 | 14 | 2-28 | 1 | MQALQTPWT  | 9  | 4  | / | / | / | / | X | 8.1E-08 | / | / | / |
|    | 2.FO4   | 3-21 | 4 | ARDWGVKYADPEV<br>FSD        | 16 | 26 | 1-5  | 2 | QQYNSYSRT  | 9  | 12 | / | / | / | X | X | 1.7E-09 | X | X | X |
|    | 2.FO5   | 4-04 | 3 | ARGYYDILTGPSDA<br>FDI       | 17 | 11 | 3-20 | 1 | QQYGSSPRT  | 9  | 5  | / | / | / | / | X | 4.3E-09 | / | / | / |
|    | 3.AO5*  | 3-09 | 6 | AKDRIASSSLDYYY<br>AYGMDV    | 20 | 16 | 1-33 | 4 | QQYDNLPLT  | 9  | 11 | / | / | / | / | X | 3.4E-10 | X | X | X |
|    | 3.DO2   | 1-69 | 6 | ASTKRGESGRGLD<br>V          | 14 | 26 | 1-33 | 2 | QQYDNLMLSS | 10 | 8  | / | / | / | / | X | 2.8E-10 | X | X | X |
|    | 3.DO5   | 1-03 | 4 | ARDPEIYYPDFRRV<br>GILGYYFDC | 23 | 26 | 3-20 | 3 | QLYGSSPLFT | 10 | 8  | / | / | / | / | X | 1.5E-09 | / | / | / |
|    | 3.FO2*  | 3-09 | 6 | AKDVAASSSSMDYY<br>YYSGMDV   | 20 | 16 | 1-33 | 5 | QQYDNLPLT  | 9  | 8  | / | / | / | / | X | 3.5E-10 | X | X | X |
|    | 3.GO1   | 1-18 | 3 | ARAATAMGIDAFDI              | 14 | 21 | 1-39 | 1 | QQTYSEPET  | 9  | 16 | / | / | / | / | X | 3.1E-07 | / | / | / |
|    | 3.GO2*  | 3-09 | 6 | AKDRSSSSSSMDYY<br>YYSGMDV   | 20 | 13 | 1-33 | 4 | QQYDNLPLS  | 9  | 4  | / | / | / | / | X | 1.1E-09 | X | X | X |
|    | 3.6DO1  | 3-11 | 4 | VRCDSYSGYELDY               | 13 | 29 | 1-33 | 2 | QQYDNLMLST | 10 | 7  | / | / | X | / | X | 8.4E-08 | X | / | / |
|    | 3.8CO3* | 3-15 | 3 | TNPTYGYYTEGGP<br>ADGYPFDL   | 21 | 19 | 3-20 | 1 | QQYGSSPWA  | 9  | 9  | / | / | / | / | X | 1.7E-10 | X | X | X |
|    | 3.8FO5  | 3-30 | 4 | AKEWDNSAYSOLDY              | 13 | 15 | 1-6  | 4 | LQDYNYPPLT | 9  | 11 | / | / | / | / | X | 2.9E-10 | X | X | X |
|    | 3.8GO6  | 3-09 | 4 | AKDPTGPIDSVGDF<br>YFDS      | 18 | 16 | 3-20 | 1 | QQYDSSPT   | 8  | 9  | / | / | / | / | X | 2.0E-10 | X | X | X |
|    | 3.9CO5* | 3-15 | 3 | TNPTYGNYAEGGP<br>AEGYPFDL   | 21 | 12 | 3-20 | 1 | QQYGSTPWA  | 9  | 13 | / | / | / | / | X | 4.4E-10 | X | X | X |
|    | 3.9GO6  | 3-20 | 3 | ARGHEVSTSMQDH<br>SDAFDV     | 19 | 10 | 1-5  | 1 | QQYESLVG   | 8  | 5  | / | / | / | / | X | 4.1E-10 | X | X | X |
| S3 | 2.AO4*  | 3-49 | 6 | ARDQLELRGVIVRV<br>GMDV      | 18 | 8  | 2-28 | 3 | MQALQTPFT  | 9  | 7  | / | / | / | / | X | 8.7E-09 | X | X | X |
|    | 2.CO2   | 3-15 | 4 | TTVSGYCGGGICAF<br>FDN       | 17 | 6  | 1-12 | 4 | QQANSFPRT  | 9  | 4  | / | / | / | / | X | 8.6E-10 | X | X | X |
|    | 2.CO3   | 3-07 | 6 | AGDDTLWNGINA                | 12 | 23 | 3-20 | 2 | QQFDRSPYT  | 9  | 20 | / | / | / | / | / |         | / | / | / |
|    | 2.FO1*  | 3-49 | 6 | ARDQLDLREVIVRV<br>GMDV      | 18 | 9  | 2-28 | 3 | MQALQTPFT  | 9  | 8  | / | / | / | / | X | 7.4E-10 | X | X | X |
|    | 2.FO4   | 4-34 | 5 | ARGMSYYGSGSYY<br>FFYNWFDP   | 21 | 5  | 1-39 | 1 | QQSNSSPRT  | 9  | 1  | / | / | / | X | X | 2.1E-08 | X | / | X |

|    |        |      |   |                           |    |    |       |   |                |    |    |   |   |   |   |   |         |   |   |   |
|----|--------|------|---|---------------------------|----|----|-------|---|----------------|----|----|---|---|---|---|---|---------|---|---|---|
|    | 2.FO6  | 3-15 | 4 | AKGYYYDTSGPYF<br>FDS      | 16 | 14 | 3-20  | 2 | QQYDRSMY       | 9  | 3  | / | / | / | / | X | 5.5E-10 | X | X | X |
|    | 2.GO1  | 3-66 | 3 | ARERPTTTRVTRTW<br>GAFDI   | 18 | 19 | 3-11  | 5 | QQRSDWPVT      | 9  | 7  | X | X | X | X | / |         | / | / | / |
|    | 2.GO2* | 3-49 | 6 | ARDQLDLREVIVRV<br>GMDV    | 18 | 13 | 2-28  | 3 | MQALQTPFT      | 9  | 12 | / | / | / | / | X | 2.0E-09 | X | X | X |
|    | 2.GO6* | 3-48 | 4 | ARDPFGYTDGHFP<br>DS       | 15 | 25 | 3-15  | 1 | QHYNDWPPW<br>T | 10 | 7  | / | / | / | / | X | 1.1E-08 | X | X | X |
|    | 3.BO6* | 3-48 | 4 | ARDPFGYTDGHFL<br>DY       | 15 | 19 | 3-15  | 1 | QHLNNWPPW<br>A | 10 | 11 | / | / | / | / | X | 3.5E-09 | X | X | / |
|    | 3.DO4  | 3-23 | 3 | AKDDRGSWTGAF<br>DV        | 15 | 16 | 1D-13 | 2 | HQFDDVPAT      | 9  | 10 | / | / | / | / | X | 8.5E-11 | / | / | / |
|    | 3.DO6  | 3-09 | 6 | AREPRGTADYYYY<br>YGMDV    | 18 | 0  | 1-17  | 2 | LQHNSYPY       | 9  | 0  | / | / | / | / | / |         | / | / | / |
|    | 3.FO5  | 3-49 | 4 | SREMGDYDSSGY<br>YEDY      | 17 | 8  | 2-30  | 2 | MQGAHWPY       | 9  | 3  | / | / | / | / | / |         | / | / | / |
|    | 3.2BO3 | 1-18 | 6 | AREPNYGSSTYYY<br>GMDV     | 17 | 9  | 2-28  | 3 | MQGLQIPIT      | 9  | 7  | / | / | / | / | / |         | / | / | / |
|    | 3.2BO4 | 3-30 | 6 | SKDRYKIYFYGMDV            | 14 | 15 | 1D-39 | 3 | HQGYNVPFT      | 9  | 17 | / | / | / | / | X | 7.5E-07 | / | / | / |
|    | 3.2BO6 | 3-07 | 5 | VTKLNDYGST                | 10 | 18 | 1-16  | 2 | EQYNSYPNT      | 9  | 10 | / | / | / | / | X | 2.1E-10 | / | / | / |
|    | 3.2CO1 | 4-39 | 6 | ASGIGVLRVDFWF<br>HAGMDV   | 19 | 0  | 2-24  | 5 | MQATQFIT       | 8  | 0  | X | / | / | X | X | 4.0E-07 | X | / | / |
| S4 | 2.AO2  | 3-07 | 4 | AAGFGAHDY                 | 9  | 16 | 4-1   | 1 | QQYYNAPAT      | 9  | 13 | / | / | / | / | / |         | / | / | / |
|    | 2.AO5* | 3-09 | 4 | AKDIAAGTHSSGYY<br>NY      | 16 | 15 | 1-5   | 2 | QEYNTFSSGT     | 10 | 17 | / | / | / | / | X | 1.1E-09 | X | X | X |
|    | 2.BO3  | 1-02 | 3 | ARVSVRYSDDAFD<br>L        | 14 | 26 | 1-33  | 3 | QQLFT          | 5  | 24 | / | / | / | X | X | 5.0E-09 | X | X | X |
|    | 2.BO4* | 3-23 | 4 | AKLQGYTSSWFGT<br>MDY      | 16 | 23 | 1-5   | 1 | QQYDSLWT       | 9  | 21 | / | / | / | / | X | 2.0E-09 | X | X | X |
|    | 2.CO1  | 3-30 | 4 | AKVALGYFEPDRFP<br>ISYYFDS | 21 | 18 | 1-5   | 1 | LQYSNHWT       | 8  | 7  | / | / | / | / | X | 4.6E-10 | X | X | X |
|    | 2.CO3  | 3-23 | 5 | AKSNEFVAVTGILD<br>R       | 15 | 17 | 1-5   | 2 | QQYSGYPY       | 9  | 16 | / | / | / | / | X | 3.2E-08 | X | / | / |
|    | 2.CO4  | 1-69 | 3 | VLRGDEGAFHL               | 11 | 29 | 1-5   | 2 | QQYYGFPY       | 9  | 13 | / | / | / | X | X | 1.3E-09 | X | X | / |
|    | 2.DO1* | 3-09 | 4 | VKDIAAGTHSSGYY<br>NY      | 16 | 17 | 1-5   | 2 | QQYNTFFSAT     | 10 | 12 | / | / | / | / | X | 1.2E-09 | X | X | X |

|    |        |        |   |                           |    |    |       |   |                 |    |    |   |   |   |   |   |         |   |   |   |
|----|--------|--------|---|---------------------------|----|----|-------|---|-----------------|----|----|---|---|---|---|---|---------|---|---|---|
|    | 2.DO6* | 4-39   | 6 | ARWAAGYYYYFYGL<br>DV      | 15 | 19 | 3-15  | 2 | QQYDKWPGY<br>T  | 10 | 5  | / | / | / | / | X | 4.5E-09 | X | / | / |
|    | 2.EO2  | 3-30   | 6 | TKVATWELDHFYGL<br>DV      | 16 | 27 | 1-9   | 1 | QQVNSYLWT       | 9  | 6  | / | / | / | / | X | 2.1E-10 | X | X | X |
|    | 2.EO4  | 3-30-3 | 4 | ARDESSGLIDY               | 11 | 40 | 2-30  | 1 | MQGAHWPPIT      | 10 | 14 | X | / | X | / | X | 3.4E-10 | X | X | X |
|    | 2.EO5* | 3-23   | 4 | AKLQGYTSSWYGT<br>MDY      | 16 | 22 | 1-5   | 1 | QQYDSLWT        | 9  | 12 | / | / | / | / | X | 3.8E-09 | X | / | X |
|    | 2.FO1* | 4-39   | 6 | ARRAGGYKYYYGL<br>DV       | 15 | 31 | 3-15  | 4 | QQYDDWLPLT      | 10 | 16 | / | / | / | / | X | 1.6E-09 | X | / | / |
|    | 2.FO5  | 3-30   | 5 | ARDRTGIGVAGTR<br>WFDP     | 17 | 5  | 1D-39 | 2 | QQSYSTPYT       | 9  | 8  | X | X | X | X | / |         | / | / | / |
|    | 3.2BO2 | 1-18   | 4 | ARTTIFGVVSDFDY            | 14 | 36 | 1-33  | 5 | QQYDTFPIT       | 9  | 20 | / | / | / | X | / |         | / | / | / |
|    | 3.2BO6 | 1-46   | 3 | ARGDLGSDV                 | 10 | 15 | 3-20  | 5 | QRYAMSTPVT      | 10 | 19 | / | / | / | / | / |         | / | / | / |
|    | 3.2CO5 | 4-04   | 3 | ARSEGLWTDGPRD<br>AFDA     | 17 | 35 | 4-1   | 4 | QQYYTTPHT       | 9  | 13 | / | / | / | / | X | 4.0E-07 | / | / | / |
|    | 3.2CO6 | 1-69   | 6 | ARVRDGHYYTMD<br>V         | 14 | 30 | 3-20  | 1 | QQCSRSSTWT      | 10 | 11 | / | / | / | / | / |         | / | / | / |
|    | 3.2DO1 | 3-23   | 3 | AKGLSKAGSRSAF<br>DI       | 15 | 7  | 4-1   | 2 | QQYYSTPPMY<br>T | 11 | 1  | X | X | / | X | / |         | / | / | / |
|    | 3.2DO2 | 1-69   | 6 | ARDPMPREVPNTY<br>YSALDV   | 19 | 37 | 3-15  | 1 | QQYFSWPPA       | 9  | 13 | / | / | / | / | X | 5.8E-09 | X | / | / |
|    | 3.2DO5 | 4-59   | 6 | ARVKKYCSTSTCN<br>YYADAMDV | 21 | 21 | 3-15  | 3 | QRYIGWPPTF<br>T | 11 | 13 | X | X | X | X | X | 3.5E-07 | / | / | / |
|    | 3.2FO1 | 3-15   | 3 | TTDTELRFLEWLPO<br>AFDI    | 18 | 9  | 1-5   | 4 | QQYHSFSLT       | 9  | 4  | / | / | / | / | X | 2.6E-07 | / | / | / |
|    | 3.2GO1 | 4-59   | 6 | ATSGLFSSPI                | 10 | 32 | 1-33  | 5 | QQYDTFPIT       | 9  | 20 | / | / | / | / | / |         | / | / | / |
| S5 | 2.AO2  | 4-b    | 5 | AREDGNSNGSNYF<br>DP       | 15 | 17 | 1D-39 | 2 | QQSYSTPYT       | 9  | 5  | / | / | / | / | / |         | / | / | / |
|    | 2.AO4  | 5-a    | 5 | ARGGYSSDWYYW<br>FDP       | 15 | 32 | 3-11  | 4 | QQRWDWPT        | 8  | 22 | / | / | / | / | / |         | / | / | / |
|    | 2.DO6  | 3-30   | 4 | AKGRSNVPMYIF<br>DF        | 15 | 21 | 4-1   | 4 | QQYYGAPIT       | 9  | 14 | / | / | / | / | / |         | / | / | / |
|    | 2.EO3  | 1-02   | 4 | ARDQGSY                   | 7  | 1  | 1-33  | 4 | QQYDNLPS        | 8  | 2  | / | / | / | / | / |         | / | / | / |
|    | 2.FO3  | 3-23   | 4 | AKSPFDSSGYMVN             | 13 | 22 | 3-15  | 1 | QQYNYWPWT       | 9  | 12 | / | / | / | X | / |         | / | / | / |
|    | 2.FO5  | 4-59   | 6 | ARHSRPPSPFHYD<br>STMDV    | 18 | 31 | 3-15  | 2 | QQSSYYYYT       | 8  | 16 | X | / | X | / | X | 1.6E-10 | / | / | / |

|    |        |        |   |                           |    |    |       |   |                 |    |    |   |   |   |   |   |         |   |   |   |
|----|--------|--------|---|---------------------------|----|----|-------|---|-----------------|----|----|---|---|---|---|---|---------|---|---|---|
|    | 2.GO5  | 5-51   | 4 | AQIFKWGSSWYQF<br>DY       | 15 | 15 | 1D-39 | 4 | QQSYSTPLT       | 9  | 13 | / | / | / | X | X | 3.1E-07 | / | / | / |
|    | 3.2AO4 | 4-30-2 | 6 | ARGVSQFSYGMDV             | 13 | 23 | 1-39  | 1 | QQTYTTPA        | 8  | 18 | / | / | / | / | X | 4.6E-08 | / | / | / |
|    | 3.2BO1 | 4-39   | 4 | ARLYGSSSSGNY              | 12 | 27 | 1-5   | 1 | QQYHSFPGT       | 9  | 8  | / | / | / | / | X | 3.1E-09 | / | / | / |
|    | 3.2EO6 | 3-15   | 6 | ATSIAFLSGYYNYF<br>YTGLDL  | 20 | 15 | 1-5   | 1 | HQYKSSPRT       | 9  | 15 | X | X | X | X | X | 1.6E-07 | X | / | / |
|    | 3.2GO5 | 3-74   | 4 | VSQVDFDMSGSK<br>SDN       | 16 | 26 | 3-11  | 3 | QHRINWPFT       | 9  | 12 | / | / | / | X | X | 9.3E-11 | / | / | / |
|    | 3.5CO1 | 3-30-3 | 4 | ARAHQVAAAGTWT<br>FDY      | 16 | 11 | 1-33  | 4 | QHYENLPLT       | 9  | 2  | / | / | / | / | X | 1.5E-09 | X | X | / |
|    | 3.5DO6 | 3-30   | 4 | ARDAGYSVDWYPG<br>AY       | 15 | 28 | 1-16  | 4 | QQYDRYPLT       | 9  | 9  | / | / | / | / | / |         | / | / | / |
|    | 3.5FO2 | 1-03   | 4 | AVWGGQSRTYSLF<br>DW       | 15 | 20 | 3-20  | 1 | QYYSESSGA       | 9  | 18 | / | / | / | / | / |         | / | / | / |
| S6 | 1.AO1  | 1-02   | 4 | AREPVFLDY                 | 9  | 21 | 3-11  | 1 | QQRNNWPPT<br>WT | 11 | 7  | / | / | / | X | X | 1.3E-06 | / | / | / |
|    | 1.AO3  | 4-30-4 | 6 | AREKVYYASGISFT<br>SGMDV   | 19 | 29 | 1-39  | 1 | QQGFTTPWT       | 9  | 13 | / | / | / | X | X | 1.2E-06 | / | / | / |
|    | 1.BO1  | 1-18   | 6 | ARHYLQGVVVDP<br>YSHAMDV   | 20 | 20 | 3-20  | 2 | QLYGSSRTT       | 9  | 14 | / | / | / | X | X | 2.3E-09 | X | / | X |
|    | 1.DO2  | 3-15   | 4 | SAGLGTSP LDS              | 11 | 28 | 2D-24 | 1 | AHAAQYPWT       | 9  | 15 | / | / | / | / | / |         | / | / | / |
|    | 1.EO1  | 1-2    | 4 | TRTKYIARPTFEY             | 14 | 21 | 1-39  | 1 | QQNYNTPQT       | 9  | 12 | / | / | X | X | / |         | / | / | / |
|    | 1.FO1  | 3-48   | 6 | ARALFVVVPVTGG<br>MDV      | 16 | 5  | 3-20  | 2 | QQYGSSPPYT      | 10 | 4  | / | / | / | X | X | 3.7E-08 | X | / | / |
|    | 1.FO3  | 3-15   | 5 | TTDPGALYGRRWF<br>DP       | 15 | 2  | 3-20  | 1 | QQYGSSPRT       | 9  | 2  | X | X | X | X | / |         | / | / | / |
|    | 1.2BO1 | 3-64   | 3 | ARDPEDFFNSAGY<br>SDI      | 16 | 33 | 1-16  | 2 | QQYESYPCT       | 9  | 13 | / | / | / | / | / |         | / | / | / |
|    | 1.2BO4 | 4-59   | 5 | ARGKTIFGVVRNW<br>FDS      | 16 | 11 | 1-13  | 5 | QQFNYPIT        | 9  | 9  | / | / | / | X | X | 1.4E-09 | X | / | X |
|    | 2.AO1  | 5-51   | 3 | ARTTCTSSTCYSLE<br>ANDAFDI | 21 | 12 | 1-39  | 2 | QQGHTTPQN       | 9  | 12 | / | / | / | / | X | 1.3E-08 | X | X | X |
|    | 2.DO3  | 4-59   | 4 | ARYCSNTRCSYMS<br>FDY      | 16 | 19 | 1-39  | 2 | QQSSDTLYS       | 9  | 15 | / | / | / | / | / |         | / | / | / |
|    | 2.DO5* | 4-59   | 6 | ARERHYETMDRI<br>DYGMDV    | 19 | 13 | 3-20  | 5 | QHYDISPSPRT     | 11 | 10 | / | / | / | / | X | 1.9E-09 | X | X | X |

|         |        |   |                              |    |    |       |   |                        |    |    |   |   |   |   |   |         |   |   |   |
|---------|--------|---|------------------------------|----|----|-------|---|------------------------|----|----|---|---|---|---|---|---------|---|---|---|
| 2.DO6   | 4-34   | 3 | ASLRSGYQRRGFN<br>V           | 14 | 7  | 3-20  | 2 | HHYDSSPRVY<br>T        | 11 | 4  | / | / | / | / | / |         | / | / | / |
| 2.EO4*  | 4-59   | 6 | ARERSYYETMDRID<br>YGMDV      | 19 | 14 | 3-20  | 5 | QHYGRSPRT<br>QQYNNWPPW | 9  | 12 | / | / | / | / | X | 1.6E-08 | X | X | X |
| 2.GO4   | 3-53   | 6 | ARSGVTIFGVVRPY<br>GMDV       | 18 | 10 | 3-15  | 1 | T                      | 10 | 5  | / | / | X | X | X | 1.8E-08 | X | / | / |
| 2.2AO5  | 3-30   | 3 | QLPTLASDV                    | 9  | 44 | 2-30  | 2 | MQGTHWPHT              | 9  | 15 | / | / | / | / | / |         | / | / | / |
| 2.2DO1* | 4-59   | 6 | ARERSYYENMDKI<br>DYGVDV      | 19 | 11 | 3-20  | 5 | QQYLSNFRT<br>QQYGTSPPW | 9  | 11 | / | / | / | / | X | 3.4E-08 | X | / | / |
| 2.2DO3  | 4-30-4 | 4 | ATSPSNYDNWNGF<br>RLHFDS      | 19 | 19 | 3-20  | 4 | S                      | 10 | 11 | / | / | / | / | X | 8.3E-09 | X | / | / |
| 2.2EO1  | 3-21   | 5 | ARALPREYRSNNW<br>FDP         | 16 | 16 | 3D-20 | 2 | QQYADFPYT              | 9  | 15 | / | / | / | / | X | 2.5E-10 | / | / | / |
| 3.3AO6  | 4-61   | 4 | ARTYYYDSSDYSQ<br>VLDYFDS     | 20 | 18 | 1D-39 | 2 | QQSYNFRYT              | 9  | 11 | / | / | / | X | X | 3.1E-10 | X | X | X |
| 3.3BO2  | 3-11   | 4 | ARGTSSGRYFDY                 | 12 | 18 | 3-15  | 4 | QQYNDWPPFT             | 10 | 9  | / | / | / | / | / |         | / | / | / |
| 3.3BO3  | 3-21   | 4 | ARWAPDDYGDFFP<br>HFDY        | 17 | 10 | 1-39  | 3 | QQSYSTPPIT             | 10 | 3  | / | / | / | / | / |         | / | / | / |
| 3.3BO6  | 4-b    | 4 | ARVLYDFYSGTFFD<br>A          | 15 | 29 | 3-20  | 3 | QQYIASPPDIT            | 11 | 22 | / | / | / | X | X | 3.2E-07 | X | / | / |
| 3.3CO1  | 3-48   | 6 | ARDLDSOSSGDYY<br>RGDHYYGMDV  | 23 | 18 | 3-20  | 2 | QQYGSSPPYT             | 10 | 5  | / | / | / | / | X | 8.8E-08 | / | / | / |
| 3.3CO3* | 4-30-4 | 6 | AGEQQHPQINYYAL<br>DV         | 16 | 19 | 1-39  | 1 | QQIYSSFRT              | 9  | 12 | / | / | / | / | X | 1.0E-09 | X | X | X |
| 3.3DO5* | 4-30-4 | 6 | AGEQHDLQINYYAL<br>DV         | 16 | 31 | 1-39  | 1 | QQIYSNFRT              | 9  | 17 | / | / | / | X | X | 4.6E-09 | X | X | / |
| 3.3EO2* | 4-30-4 | 6 | AGEQQYPQINYYSL<br>DV         | 16 | 33 | 1-39  | 1 | QQIYSGFRT              | 9  | 18 | / | / | / | / | X | 2.7E-09 | X | X | X |
| 3.3EO6  | 1-02   | 4 | ARDPSLDTSYFD<br>S            | 14 | 14 | 3-15  | 3 | QHYNWPPPI<br>T         | 11 | 8  | / | / | / | / | X | 1.5E-09 | X | X | / |
| 3.3FO1  | 1-69   | 6 | SRVWEWRRNLNM<br>DYCGMDV      | 19 | 30 | 1-39  | 1 | QQSYITPVT              | 9  | 14 | / | / | / | / | X | 1.0E-09 | X | X | X |
| 3.3FO3  | 3-53   | 6 | ARVLTADYYYGMD<br>V           | 14 | 5  | 1-39  | 4 | QQSYSSPA               | 8  | 3  | / | / | / | / | X | 7.4E-09 | / | / | / |
| 3.3FO5  | 3-49   | 4 | ARDFAGYCTSTSC<br>SHPYSHNYFDH | 24 | 19 | 1-5   | 1 | QQYDAYPRT              | 9  | 13 | / | / | / | / | / |         | / | / | / |
| 3.3GO1  | 1-02   | 4 | VREGGSSGYMTAD<br>Y           | 14 | 25 | 1D-17 | 1 | LQYDTYPWT              | 9  | 9  | / | / | / | / | X | 3.1E-10 | / | / | / |

|    |        |        |   |                            |    |    |       |   |                 |    |    |   |   |   |   |   |         |   |   |   |
|----|--------|--------|---|----------------------------|----|----|-------|---|-----------------|----|----|---|---|---|---|---|---------|---|---|---|
|    | 3.3GO4 | 3-23   | 3 | AKDALFYGSGEE<br>AFDV       | 17 | 15 | 3-20  | 2 | QHHGSSPYT       | 9  | 5  | / | / | / | / | X | 2.8E-10 | X | X | X |
|    | 3.3GO5 | 3-73   | 6 | SRPSYSSAWYLPN<br>RMDV      | 17 | 25 | 1-33  | 2 | QQYDNLPPFT      | 10 | 16 | / | / | X | X | X | 1.8E-07 | X | / | X |
| S7 | 2.AO4  | 3-09   | 4 | AAAFYGDPLKADY              | 13 | 16 | 1-5   | 1 | QQYNNFPWT       | 9  | 16 | X | / | X | X | X | 3.1E-07 | X | / | / |
|    | 2.BO3  | 3-30-3 | 6 | AKDGGGYFYYGMD<br>V         | 14 | 25 | 3-15  | 1 | QQYNSWPRT       | 9  | 9  | / | / | / | / | X | 4.6E-09 | X | / | / |
|    | 2.CO1  | 1-08   | 6 | ARGPSSIAKHYMDV             | 14 | 16 | 1-33  | 2 | QQYNSLPRRV<br>I | 11 | 22 | X | / | X | / | / |         | / | / | / |
|    | 2.CO2  | 3-23   | 4 | AKDRYGVGSNPLF<br>DN        | 15 | 26 | 1D-39 | 5 | QQSYSTPIT       | 9  | 13 | / | / | / | / | / |         | / | / | / |
|    | 2.CO4  | 3-74   | 4 | ARDALTSRSFDS               | 12 | 23 | 1D-39 | 2 | QQSYSTPYT       | 9  | 16 | / | / | / | / | / |         | / | / | / |
|    | 2.CO6  | 3-43   | 6 | AKTYDILTGPSYY<br>GMDV      | 18 | 3  | 2-28  | 2 | MQUALQTPPYT     | 10 | 0  | / | / | / | / | / |         | / | / | / |
|    | 2.DO2  | 3-23   | 4 | AKDQVRVIPGTGYL<br>DH       | 16 | 15 | 3-11  | 4 | QQRSNWPPLT      | 10 | 8  | X | / | X | / | X | 2.1E-08 | X | / | / |
|    | 2.DO5  | 3-15   | 3 | TTSVKSGTVG                 | 10 | 11 | 2-30  | 1 | MQGTHWPWT       | 9  | 8  | / | / | / | / | / |         | / | / | / |
|    | 2.EO2  | 3-30   | 6 | AKDPGWRTQLPLN<br>PDYYYGMDV | 22 | 32 | 1-16  | 4 | QQYDRYPLT       | 9  | 9  | / | / | / | / | X | 4.1E-07 | X | / | / |
|    | 2.FO2  | 3-23   | 3 | AKGAPPGSAFDV               | 12 | 25 | 2-30  | 2 | MQGTHWPYT       | 9  | 6  | X | / | / | / | / |         | / | / | / |
|    | 2.FO4  | 4-39   | 6 | AHSGPYTIMDNFSY<br>YALDV    | 19 | 24 | 3-15  | 5 | QQYDNWPPIT      | 10 | 10 | / | / | / | / | X | 9.7E-10 | X | X | X |
|    | 2.GO5  | 4-04   | 4 | ARDYESAYSYGLLY<br>Y        | 15 | 20 | 4-1   | 1 | QQYYSTPWT       | 9  | 15 | / | / | / | / | / |         | / | / | / |
| S8 | 1.AO6  | 4-39   | 6 | ARRAGGYLYFYGM<br>DV        | 15 | 22 | 3-15  | 5 | QQYNDWLPIIT     | 10 | 12 | X | / | X | / | X | 4.3E-09 | X | / | / |
|    | 1.DO1  | 1-18   | 4 | VRNRYINSPFAN               | 12 | 24 | 1-9   | 5 | QQVYIFPFT       | 9  | 9  | X | X | X | / | / |         | / | / | / |
|    | 1.DO6  | 4-59   | 4 | ARLSSRWGDGYTP<br>AY        | 15 | 28 | 1-39  | 4 | QQSYNTPLT       | 9  | 21 | X | / | X | X | X | 7.0E-07 | / | / | / |
|    | 1.GO5  | 4-31   | 4 | ARAPFNRRRLVTLFG<br>TYFFDT  | 20 | 26 | 3-20  | 5 | QHYSIPQNT       | 10 | 15 | X | X | X | X | X | 6.5E-08 | X | / | / |
|    | 1.3EO2 | 3-49   | 6 | TRDKSRDGATRVLV<br>GMDV     | 18 | 10 | 4-1   | 4 | QQFYTTPLT       | 9  | 7  | / | / | / | X | / |         | / | / | / |
|    | 1.3FO5 | 4-59   | 5 | ARRRVGQFVYHFD<br>S         | 14 | 18 | 3-11  | 2 | QRGSKWPPM<br>YT | 11 | 8  | / | / | / | / | / |         | / | / | / |



|        |        |   |                              |    |    |       |   |                    |    |    |   |   |   |   |   |         |   |   |   |
|--------|--------|---|------------------------------|----|----|-------|---|--------------------|----|----|---|---|---|---|---|---------|---|---|---|
| 1.3GO1 | 5-51   | 4 | ARFDWPQFDY                   | 10 | 3  | 3-15  | 4 | QQYNNWPPLT         | 10 | 2  | / | / | / | / | / |         | / | / | / |
| 2.AO1  | 3-11   | 6 | ARDYYGSGNYLPY<br>YYYAMDV     | 20 | 19 | 3-11  | 4 | QERSNSFT           | 8  | 6  | / | / | / | / | / |         | / | / | / |
| 2.BO3  | 3-53   | 6 | AREATTVTTYGYYY<br>YGMDV      | 19 | 2  | 3-15  | 2 | QQYNNWPPP<br>TLGNT | 14 | 1  | / | / | / | X | X | 2.4E-07 | X | / | / |
| 2.DO1  | 4-30-2 | 4 | ARGYYSNYVPHFD<br>Y           | 14 | 12 | 1D-39 | 2 | QQSSSTPYT          | 9  | 8  | / | / | / | / | / |         | / | / | / |
| 2.EO1  | 4-39   | 6 | ARRHRIVARREFYFF<br>GMDV      | 18 | 17 | 1-12  | 2 | QQANSFPLT          | 9  | 14 | / | X | / | / | / |         | / | / | / |
| 2.EO2  | 6-01   | 4 | ARDRGYSGFGSFD<br>Y           | 14 | 15 | 1-12  | 2 | QRTNSFPCT          | 9  | 12 | / | / | / | / | X | 4.5E-08 | X | / | / |
| 2.FO2  | 1-69   | 5 | ARDESRRVVAAP<br>FDS          | 16 | 24 | 3-20  | 2 | QQYGSSPYT          | 9  | 7  | / | / | / | / | / |         | / | / | / |
| 2.2AO3 | 1-46   | 4 | ARDSNGVCLF                   | 10 | 27 | 1-5   | 2 | QQYKRLHS           | 8  | 15 | / | / | / | / | / |         | / | / | / |
| 2.2CO1 | 3-07   | 3 | ARGRAVDI                     | 8  | 8  | 2-30  | 4 | MQGTHWPPF<br>T     | 10 | 13 | / | X | / | X | / |         | / | / | / |
| 2.2DO3 | 3-07   | 4 | ARVRGRGSYSGNY<br>FDY         | 16 | 15 | 1-39  | 1 | QQSYSTPWT          | 9  | 7  | / | / | / | / | / |         | / | / | / |
| 2.2EO3 | 3-11   | 4 | ARDRGEGETTTFDY               | 13 | 10 | 1-33  | 3 | QQIFT              | 5  | 9  | / | / | / | / | X | 7.4E-09 | X | X | X |
| 2.2EO5 | 1-03   | 6 | AREKGVSGLFCRD<br>GSCYGMDV    | 21 | 27 | 4-1   | 4 | QQYYTPPLT          | 9  | 10 | / | / | / | / | / |         | / | / | / |
| 2.2FO1 | 4-59   | 6 | AKSLVRGVFYYYG<br>MDV         | 16 | 10 | 1-39  | 1 | QQSFSPWWT          | 9  | 10 | X | X | / | X | / |         | / | / | / |
| 2.2FO3 | 1-03   | 6 | ARAKEPMFRGLIDG<br>YGVDV      | 19 | 18 | 4-1   | 4 | HQYYSTPLT          | 9  | 10 | / | / | / | / | X | 7.6E-08 | / | / | / |
| 2.2FO4 | 4-39   | 6 | ARRRDGYKYYYGM<br>DV          | 15 | 19 | 1-39  | 5 | QQTYSPLPIT         | 10 | 5  | / | / | / | / | X | 9.4E-10 | X | / | / |
| 3.DO2  | 3-21   | 3 | ARVSPLSLIVGISGA<br>LDI       | 18 | 10 | 1-5   | 4 | QHNGYLT            | 8  | 5  | / | / | / | X | X | 2.5E-07 | / | / | / |
| 3.EO1  | 4-39   | 4 | ARPRYCSGGSCYS<br>GLGQYHFDF   | 22 | 24 | 2-28  | 4 | MQALQTPLT          | 9  | 6  | / | / | / | / | / |         | / | / | / |
| 3.EO4* | 1-46   | 3 | ARDLLELLVYTYDS<br>AGSSDAFDI  | 23 | 26 | 3D-15 | 4 | QQYDTWPLT          | 9  | 9  | / | / | / | / | X | 4.4E-08 | X | / | / |
| 3.FO5  | 3-48   | 4 | ARGLFEGASRDCA<br>GGRCSSAAFDI | 24 | 14 | 1-33  | 2 | QQYDNFPPT          | 9  | 7  | / | / | / | / | X | 6.5E-08 | / | / | / |
| 3.GO4  | 4-59   | 6 | GGRFYDSSSGPKN<br>YGVDI       | 18 | 23 | 1-39  | 1 | QQSYSTPRT          | 9  | 0  | / | / | / | / | / |         | / | / | / |

|     |         |        |   |                             |    |    |       |   |                        |    |    |   |   |   |   |   |         |   |   |   |
|-----|---------|--------|---|-----------------------------|----|----|-------|---|------------------------|----|----|---|---|---|---|---|---------|---|---|---|
|     | 3.2AO6  | 3-74   | 4 | ARCLALSNIQCYHY<br>FDQ       | 17 | 23 | 3-11  | 2 | QQRSSWYT               | 8  | 12 | / | / | / | X | X | 1.8E-10 | / | / | / |
|     | 3.2CO1* | 1-46   | 3 | ARDLLELLVYTYDS<br>AGSLDAFDI | 23 | 21 | 3-15  | 4 | QQYDGWPLT              | 9  | 7  | / | / | / | / | X | 3.5E-08 | X | / | / |
|     | 3.2CO2  | 3-43   | 6 | AKDRSLRIFDRYGV<br>DV        | 16 | 11 | 1-12  | 4 | QQASSFPLT              | 9  | 18 | / | X | / | X | X | 1.9E-08 | / | / | / |
| S9  | 3.AO3   | 4-30   | 4 | ARGHHVSAYFDP                | 12 | 37 | 1D-39 | 2 | QQSYSPPLYT             | 10 | 32 | / | / | / | / | / |         | / | / | / |
|     | 3.CO3   | 3-64   | 4 | VIRRGAATEY                  | 10 | 37 | 3-15  | 1 | QLYNNWPAWT             | 10 | 15 | / | / | X | / | X | 6.4E-07 | X | / | / |
|     | 3.FO3   | 3-07   | 4 | CVGGYAYW                    | 8  | 12 | 1-17  | 1 | LQYNIYPPT              | 9  | 5  | / | / | / | X | X | 6.9E-07 | / | / | / |
|     | 3.FO6   | 3-07   | 6 | AREVGFAGYWGS<br>WTSYGMDV    | 20 | 24 | 1-9   | 3 | QQLNTYPFT              | 9  | 6  | / | / | / | X | / |         | / | / | / |
|     | 3.2BO3  | 3-53   | 5 | VALQTYSYDTSGFT<br>ADGYFDP   | 22 | 31 | 1-39  | 1 | QQGYSMPWP              | 9  | 12 | / | / | / | / | X | 5.0E-10 | X | X | X |
|     | 3.2EO4  | 1-02   | 6 | ARSRAMDV                    | 8  | 17 | 2D-29 | 4 | MQTMQPLPA              | 9  | 12 | / | / | / | / | / |         | / | / | / |
|     | 3.2GO6  | 3-53   | 4 | ATNTVY                      | 6  | 7  | 2D-29 | 1 | MQRTQLPET              | 9  | 7  | / | / | / | / | / |         | / | / | / |
|     | 3.3BO2  | 3-20   | 3 | VRKAYGDAFDF                 | 11 | 22 | 1D-39 | 5 | QQSHSNPIT              | 9  | 26 | X | X | / | / | / |         | / | / | / |
|     | 3.3CO1  | 3-23   | 4 | ARRMIYSGSFS                 | 13 | 23 | 1-9   | 1 | QQLNSSPWT              | 9  | 11 | X | X | X | X | X | 4.3E-08 | X | / | / |
|     | 3.3DO6  | 3-73   | 5 | IRPDDHANPRT                 | 11 | 21 | 1-5   | 2 | QQYNTYLYT              | 9  | 10 | / | / | / | / | X | 5.8E-08 | X | / | / |
|     | 3.3GO4  | 3-23   | 3 | AKIRSTPGNHDA<br>SDI         | 15 | 11 | 1-5   | 1 | QQYNSYWT               | 8  | 5  | / | / | / | / | / |         | / | / | / |
| S10 | 1.BO2*  | 3-15   | 4 | AHEASGALRD                  | 10 | 34 | 3-20  | 3 | QVFGGSPPT              | 10 | 29 | / | / | / | / | / |         | / | / | / |
|     | 1.CO6   | 3-48   | 3 | AGDPDTPFIRVFEM              | 14 | 23 | 1-9   | 5 | QQLNTYPPIT             | 10 | 13 | / | / | / | X | X | 3.2E-09 | X | / | / |
|     | 1.DO3   | 3-30   | 6 | ARSPASGYLDGDY<br>FSWHYSLDV  | 23 | 36 | 1-17  | 1 | LQHNTYPYT              | 9  | 12 | X | / | / | X | / |         | / | / | / |
|     | 1.EO1   | 4-39   | 5 | AHSTPGYNSGWRP<br>FDP        | 16 | 33 | 1-5   | 2 | QQYHSYVYT              | 9  | 10 | / | / | / | / | / |         | / | / | / |
|     | 1.EO2   | 4-59   | 3 | ARDRTGMTDINAF<br>DI         | 15 | 22 | 1-39  | 1 | HQSYDTPQT              | 9  | 8  | / | / | / | X | X | 1.3E-08 | X | / | / |
|     | 1.FO4   | 3-07   | 3 | VRHNEARLATAYSG<br>YDFDAYDV  | 22 | 23 | 1D-39 | 2 | QQSYSALNS<br>QQSQSHYTP | 9  | 23 | / | / | / | / | / |         | / | / | / |
|     | 1.GO1   | 3-49   | 3 | SRGGVSSGYDGLN<br>ALDI       | 17 | 11 | 1-39  | 1 | WT                     | 11 | 11 | / | / | / | / | / |         | / | / | / |
|     | 1.GO3   | 3-23   | 3 | AKLRSSGWYAPIDI              | 14 | 28 | 4-1   | 2 | QQYYSSPS               | 8  | 8  | X | X | X | X | X | 1.2E-07 | X | / | / |
|     | 1.GO6   | 4-30-4 | 3 | AREVIEPGDSDAFD<br>I         | 15 | 23 | 3-15  | 4 | QHYINQPLT              | 9  | 9  | / | / | / | / | / |         | / | / | / |

|    |         |      |   |                           |    |    |       |   |                       |    |    |   |   |   |   |   |         |   |   |   |
|----|---------|------|---|---------------------------|----|----|-------|---|-----------------------|----|----|---|---|---|---|---|---------|---|---|---|
|    | 2.CO3   | 3-30 | 5 | ARDGNVLNGIDP              | 12 | 12 | 1-6   | 4 | LQDYNPPS              | 9  | 8  | / | / | / | / | X | 2.0E-07 | X | / | / |
|    | 2.EO5   | 3-07 | 4 | AREGGSYDWNDAR<br>RY       | 14 | 13 | 1-16  | 4 | QQYKTYPLT             | 9  | 8  | / | / | / | X | / |         | / | / | / |
|    | 2.FO4   | 4-31 | 4 | ARAAPYSDS                 | 9  | 27 | 4-1   | 1 | QQYHSTPPWT            | 10 | 16 | / | / | / | / | X | 1.4E-06 | / | / | / |
|    | 2.FO5*  | 4-b  | 4 | ARRGSGSYFSFDY             | 13 | 10 | 3-20  | 4 | QHYGSSALT             | 9  | 1  | / | / | / | X | / |         | / | / | / |
|    | 2.GO1*  | 4-b  | 4 | ARRGSGSYFSFDY             | 13 | 14 | 3-20  | 4 | QHYGSSALT             | 9  | 1  | / | / | / | X | X | 2.2E-07 | X | / | / |
|    | 2.2AO1* | 3-15 | 4 | AHEASGALRD                | 10 | 29 | 3-20  | 3 | QVFGGSPPT             | 10 | 31 | / | / | / | / | / |         | / | / | / |
|    | 2.2EO6  | 1-03 | 6 | ARDRPDSSGYGST<br>GLDV     | 17 | 15 | 3-11  | 4 | QQRTSWPLT             | 9  | 5  | X | X | / | / | X | 9.8E-07 | / | / | / |
| C1 | 1.AO1   | 3-66 | 4 | ATSPSAGY                  | 8  | 13 | 1-5   | 2 | QQYHSYPYT             | 9  | 22 | / | / | X | / | / |         | / | / | / |
|    | 1.BO1*  | 3-48 | 4 | AREEVVAGTPFD<br>S         | 14 | 18 | 3-15  | 1 | HQYSGWPPW<br>T        | 10 | 15 | / | / | / | / | X | 2.9E-09 | X | X | / |
|    | 1.CO2   | 3-15 | 6 | ATGGGSASGMYYY<br>NGLDV    | 18 | 12 | 2D-29 | 2 | MQSIQLPYT             | 9  | 10 | / | / | / | / | X | 3.4E-10 | X | X | X |
|    | 1.CO5   | 4-b  | 3 | VRDGSRYCVSGTC<br>FSGDAFDV | 21 | 32 | 3-NL5 | 1 | QHYDNSPKT             | 9  | 70 | / | / | / | / | / |         | / | / | / |
|    | 1.DO2   | 3-64 | 3 | ARSRNQLLVSDALD<br>I       | 15 | 7  | 3D-20 | 4 | QQYGTSLT<br>QQYNKWPPW | 9  | 11 | / | / | / | / | / |         | / | / | / |
|    | 1.DO5*  | 3-48 | 4 | ANMRAWFWYDPA<br>DDIGH     | 17 | 18 | 3-15  | 1 | T                     | 10 | 13 | / | / | / | / | X | 2.7E-09 | X | X | X |
|    | 1.EO4   | 4-39 | 6 | ARDRGGEEYYYGM<br>DV       | 15 | 21 | 1D-39 | 2 | QQGYSTPHT             | 9  | 19 | / | / | / | / | X | 2.8E-09 | X | / | / |
|    | 1.FO2   | 4-39 | 6 | AKINSGYEYYYGM<br>DV       | 15 | 21 | 3-15  | 2 | QQYNNWLYT             | 9  | 13 | / | / | / | / | X | 3.9E-09 | X | / | / |
|    | 1.FO5*  | 4-59 | 5 | ARSAQCTGDVCFG<br>GPSWFDP  | 20 | 31 | 3-15  | 2 | HQYNNWPYT             | 9  | 6  | / | / | / | / | X | 1.1E-08 | X | / | X |
|    | 1.GO1*  | 3-48 | 4 | ANMRAWFYDPA<br>DIGH       | 17 | 21 | 3-15  | 1 | QQYNKWPPW<br>T        | 10 | 9  | / | / | / | / | X | 4.9E-09 | X | X | X |
|    | 1.2AO2* | 3-48 | 4 | VREAVIVDGMPFEY            | 14 | 35 | 3-15  | 1 | HQYKGWPPW<br>T        | 10 | 19 | / | / | / | / | X | 3.3E-09 | X | X | X |
|    | 1.2AO6* | 4-59 | 5 | ARSAHCTDDVCFG<br>GPSWFDP  | 20 | 15 | 3-15  | 2 | HQYNNWPYT             | 9  | 4  | / | / | / | / | X | 5.1E-09 | X | X | X |
|    | 1.2BO2  | 3-30 | 5 | VKDPGDPWSGHFD<br>P        | 14 | 29 | 3-15  | 2 | HQYNNWPYT             | 9  | 11 | / | / | / | / | / |         | / | / | / |
|    | 1.2BO5* | 1-18 | 3 | ARGFDYGDYRGRA<br>FDV      | 16 | 15 | 1-33  | 3 | QQSNT                 | 5  | 6  | / | / | / | / | X | 1.4E-08 | X | X | X |

|         |        |   |                            |    |    |      |   |                 |    |    |   |   |   |   |   |         |   |   |   |
|---------|--------|---|----------------------------|----|----|------|---|-----------------|----|----|---|---|---|---|---|---------|---|---|---|
| 1.2BO6* | 4-39   | 6 | ARVPDGYKYYYGM<br>DV        | 15 | 28 | 3-15 | 5 | QQYYNWTPIT      | 10 | 8  | / | / | / | / | X | 9.9E-10 | X | / | / |
| 1.2DO3  | 3-15   | 4 | TTASNPYNWNGPY<br>FDY       | 16 | 10 | 1-5  | 2 | QQYNVYSPMY<br>T | 11 | 3  | X | / | X | / | X | 4.0E-09 | X | / | X |
| 1.2EO1  | 3-20   | 3 | AREMRDPYDAFDL              | 13 | 28 | 1-39 | 5 | QQSSTNPKT       | 9  | 22 | / | / | / | / | X | 1.6E-09 | X | X | X |
| 1.2FO4  | 1-69   | 4 | ARRYHSAPGYFD<br>S          | 14 | 32 | 3-15 | 1 | QQYNDWTWT       | 9  | 12 | X | / | X | / | X | 2.2E-09 | X | / | / |
| 1.2GO2  | 3-21   | 3 | VKDRIQWTLRGAF<br>DI        | 15 | 27 | 1-5  | 1 | QHYEGYSWT       | 9  | 12 | X | / | X | / | X | 1.4E-10 | / | / | / |
| 1.2GO4* | 1-18   | 3 | TRGFDYGDYRGRA<br>FDV       | 16 | 15 | 1-33 | 3 | QQSNT           | 5  | 9  | / | / | / | / | X | 5.4E-09 | X | X | X |
| 1.3AO2* | 3-23   | 3 | AKNRGWQLGPDAF<br>DI        | 15 | 23 | 1-13 | 5 | QQFNSYPIT       | 9  | 6  | / | / | / | / | X | 5.0E-09 | X | / | / |
| 1.3AO3* | 4-39   | 6 | ARRCGGYQYYYG<br>MDV        | 15 | 17 | 3-15 | 5 | QQYNNWAPIT      | 10 | 11 | / | / | / | / | X | 1.0E-09 | X | / | / |
| 1.3BO1* | 3-48   | 4 | ANMRAWFWYDPA<br>DDIGH      | 17 | 21 | 3-15 | 1 | QQYTKWPPW<br>T  | 10 | 10 | / | / | / | / | X | 1.1E-07 | X | X | / |
| 1.3BO2  | 4-59   | 4 | ARFWREETYGSCF<br>DY        | 15 | 20 | 1-39 | 1 | QQSSTTPPW       | 10 | 13 | / | / | / | / | X | 3.2E-09 | X | / | / |
| 1.3CO1  | 3-30   | 5 | VKDPGDPWSGWF<br>DP         | 14 | 35 | 1-12 | 2 | QQGFSFPYT       | 9  | 33 | / | / | / | / | X | 1.6E-09 | X | X | X |
| 1.3CO4  | 4-30-2 | 6 | ARVGDNGSSYGM<br>DV         | 14 | 18 | 1-6  | 4 | LQDYSYPLT       | 9  | 9  | / | / | / | / | X | 5.7E-08 | X | X | X |
| 1.3EO3* | 3-48   | 4 | ANMRAWFWYDPA<br>DDIGH      | 17 | 25 | 3-15 | 1 | QQYAGWPPW<br>T  | 10 | 12 | / | / | / | / | X | 1.2E-08 | X | X | / |
| 1.3EO5  | 4-39   | 6 | ARQQEGYYYYYGM<br>DV        | 15 | 20 | 3-20 | 3 | QQYTSPGFT       | 9  | 5  | / | / | / | / | X | 1.2E-09 | X | / | X |
| 2.BO2   | 1-02   | 3 | ARAVYYDLTSDFCV<br>DCYDAFDV | 22 | 18 | 1-9  | 1 | QQLNSYVVT       | 9  | 10 | / | / | / | / | X | 5.8E-10 | X | X | X |
| 2.BO5   | 1-02   | 4 | ARGPSISDG TENLF<br>EF      | 16 | 30 | 4-1  | 4 | QQYHKTPLT       | 9  | 30 | / | / | / | / | / |         | / | / | / |
| 2.CO6*  | 3-23   | 3 | VKNRGWQLGPDAF<br>DS        | 15 | 47 | 1-13 | 5 | QQFNSYPIT       | 9  | 35 | X | / | X | / | X | 2.4E-09 | X | X | X |
| 2.DO5*  | 3-23   | 3 | ARNRGWQLGPDAF<br>AI        | 15 | 35 | 1-13 | 5 | QQFNSYPIS       | 9  | 13 | / | / | / | / | X | 1.8E-09 | X | X | X |
| 2.EO3*  | 3-15   | 4 | TTVYYYESTAFITG<br>DY       | 17 | 18 | 4-1  | 4 | QQHYTTPIT       | 9  | 15 | / | / | / | / | / |         | / | / | / |
| 2.EO5*  | 3-48   | 4 | VREEVIVGGIPFDY             | 14 | 31 | 3-15 | 1 | HQYHDWPPW<br>T  | 10 | 12 | / | / | / | / | X | 1.5E-09 | X | X | X |

|         |        |   |                                           |    |    |       |   |                 |    |    |   |   |   |   |   |         |   |   |   |
|---------|--------|---|-------------------------------------------|----|----|-------|---|-----------------|----|----|---|---|---|---|---|---------|---|---|---|
| 2.GO4*  | 3-23   | 3 | VKNRGWQLGPDAF<br>DI                       | 15 | 34 | 1-13  | 5 | QQFKSYPIT       | 9  | 16 | / | / | X | / | X | 1.4E-09 | X | X | X |
| 2.2AO5  | 3-23   | 4 | AKDQVGATSYYFD<br>H                        | 14 | 30 | 3-11  | 5 | QQRNNWPTT       | 9  | 10 | / | / | / | / | / |         | / | / | / |
| 2.2AO6* | 3-15   | 4 | TTVYYYESTAFITG<br>DY                      | 17 | 18 | 4-1   | 4 | QQHYTTPIT       | 9  | 15 | / | / | / | / | / |         | / | / | / |
| 2.2BO2  | 1-69   | 5 | ARSDWNDLFLV<br>ATHARVQSTYDQA<br>YFYYYAMDD | 11 | 29 | 4-1   | 4 | QQYTTPLT        | 9  | 6  | / | / | / | / | / |         | / | / | / |
| 2.2BO3  | 1-24   | 6 | AGAFLSNIGPYEY                             | 22 | 7  | 3-20  | 3 | QQYGTSPFT       | 9  | 8  | / | / | / | / | / |         | / | / | / |
| 2.2CO3  | 4-59   | 4 | AGAFLSNIGPYEY                             | 13 | 32 | 1-5   | 2 | QQCRSFSANT      | 10 | 17 | / | / | / | / | / |         | / | / | / |
| 2.2CO4* | 3-23   | 3 | AKNRGWQLGPDG<br>FDI                       | 15 | 35 | 1-13  | 5 | QQFNSYPIT       | 9  | 11 | X | X | X | / | X | 1.0E-09 | X | X | X |
| 2.2CO6  | 1-69   | 6 | ARQDIAVAGPNDYY<br>YYNMDV                  | 20 | 31 | 2-28  | 5 | MQALQTPLIT      | 10 | 10 | / | / | / | / | / |         | / | / | / |
| 2.2DO6  | 4-b    | 5 | ARQSIYTGNHFPKF<br>DP                      | 16 | 17 | 1-13  | 4 | QQFNSYPPEV<br>T | 11 | 7  | / | / | / | / | X | 2.0E-08 | X | / | / |
| 2.2FO3  | 4-59   | 6 | ARTMDTSGWQPY<br>YGMDV                     | 18 | 17 | 3-20  | 2 | QQYGSSPMYT      | 10 | 12 | / | / | / | / | X | 5.0E-08 | X | X | X |
| 2.2FO4  | 3-30-3 | 4 | VRGQDSSHFYDA                              | 12 | 29 | 3-15  | 1 | QQYDFWPT        | 8  | 16 | / | / | / | / | X | 2.5E-10 | X | X | X |
| 2.2GO1* | 3-23   | 3 | AKNRGWQLGPDAF<br>DI                       | 15 | 33 | 1-13  | 5 | QQFNSYPIT       | 9  | 18 | X | X | X | / | X | 1.4E-09 | X | X | X |
| 2.2GO3  | 5-a    | 4 | ARVYGDYALDH                               | 11 | 30 | 1-9   | 1 | QQLKSYPPT       | 9  | 22 | / | / | / | / | / |         | / | / | / |
| 2.2GO5  | 3-74   | 5 | VRGVMTYFDP                                | 10 | 30 | 3-11  | 1 | QHRGDGPPT<br>WT | 11 | 11 | / | / | / | / | X | 8.5E-09 | / | / | X |
| 3.7BO1* | 4-59   | 3 | ARFHYYDNTGYYID<br>AFDI                    | 18 | 16 | 1-5   | 2 | QQYNSYPYT       | 9  | 6  | / | / | / | / | X | 2.9E-09 | X | / | / |
| 3.7BO4  | 4-30-2 | 6 | ARVGDNGSSYGM<br>DV                        | 14 | 18 | 1D-39 | 5 | QQSYSNPIT       | 9  | 13 | / | / | / | / | X | 1.5E-08 | / | / | / |
| 3.7BO5  | 3-23   | 3 | AQEGYSSGRCGAY<br>HV                       | 15 | 23 | 1-5   | 1 | QQYDNYSPA       | 9  | 19 | X | / | X | / | X | 7.5E-07 | / | / | / |
| 3.7CO2* | 4-59   | 3 | ARFHYYDSSGFFID<br>AFDI                    | 18 | 11 | 1-5   | 2 | QQYNSLYT        | 9  | 4  | / | / | / | X | X | 2.0E-07 | X | / | / |
| 3.7DO2* | 4-59   | 3 | ARFHYYDSSGYYN<br>DAFDI                    | 18 | 12 | 1-5   | 2 | QQYNSYPYT       | 9  | 10 | / | / | / | / | X | 4.2E-09 | X | / | / |
| 3.7DO4* | 4-59   | 3 | ARFHYYDSSGYFID<br>AFDI                    | 18 | 14 | 1-5   | 2 | QQYNSMYT        | 9  | 6  | / | / | / | / | X | 3.6E-09 | X | / | / |
| 3.7DO5  | 1-46   | 3 | ARAGYYYDSYGLD<br>AFNI                     | 17 | 8  | 3-11  | 1 | QQRSNWPRT       | 9  | 0  | X | / | X | / | / |         | / | / | / |

|    |         |      |   |                             |    |    |       |   |                |    |    |   |   |   |   |   |         |   |   |   |
|----|---------|------|---|-----------------------------|----|----|-------|---|----------------|----|----|---|---|---|---|---|---------|---|---|---|
|    | 3.7EO4  | 3-11 | 6 | ARGNYGFDV                   | 9  | 9  | 3-20  | 1 | QQYGSLSWT      | 9  | 9  | / | / | / | / | / |         | / | / | / |
|    | 3.7FO2  | 1-46 | 3 | ARGGVGPTWGYD<br>AFNM        | 16 | 37 | 3-11  | 2 | QQYRFSSYT      | 9  | 15 | / | / | / | / | X | 1.2E-08 | X | / | / |
|    | 3.7FO5  | 1-02 | 4 | ARYTAGWYGDY                 | 11 | 27 | 1-8   | 1 | QQYYDFPRT      | 9  | 20 | / | / | / | / | / |         | / | / | / |
|    | 3.7GO2* | 4-59 | 3 | ARFHFYDSSGFLN<br>DAFDV      | 18 | 27 | 1-5   | 2 | HQYNSYPYT      | 9  | 22 | / | / | / | / | X | 1.8E-08 | X | / | / |
| C2 | 2.BO4   | 3-23 | 4 | AKQLLKGG                    | 8  | 21 | 1-5   | 1 | QQYVAYPWT      | 9  | 11 | X | / | X | X | / |         | / | / | / |
|    | 2.EO2   | 1-18 | 4 | ARDRSRIRFPFGY               | 13 | 5  | 3-20  | 1 | QQYGTSPPT      | 9  | 2  | / | / | / | / | / |         | / | / | / |
|    | 2.2BO2  | 3-23 | 3 | TKRLPSWGAFEI                | 12 | 25 | 3-20  | 4 | QQYPAAPLA      | 9  | 15 | / | / | / | / | / |         | / | / | / |
|    | 2.2FO5  | 3-48 | 4 | VREQYSSVWSVSH<br>FDF        | 16 | 23 | 1-39  | 2 | QQSYSTPQCT     | 10 | 12 | / | / | / | / | / |         | / | / | / |
|    | 2.2GO5  | 1-18 | 6 | ARDLVQGAVSHYT<br>GLDV       | 17 | 25 | 3-20  | 1 | KQYGSSTET      | 9  | 9  | / | / | / | / | X | 2.5E-08 | X | / | / |
|    | 2.3AO6  | 4-61 | 6 | AKMCSSSNCYSYF<br>YEMDV      | 18 | 24 | 2-30  | 5 | MQASYWPRT      | 9  | 16 | / | / | / | / | / |         | / | / | / |
|    | 2.3BO1  | 3-21 | 4 | ARGDGSGNYLGEIL<br>FDY       | 17 | 21 | 1-5   | 2 | QQYNSGYT       | 8  | 9  | / | / | / | / | / |         | / | / | / |
|    | 3.AO3   | 3-48 | 4 | ARVHVPYGDYIRTV<br>LDY       | 17 | 9  | 3-15  | 2 | QQHNKWPPY<br>T | 10 | 5  | / | / | / | / | X | 4.7E-09 | X | / | / |
|    | 3.CO1*  | 4-04 | 4 | ARLRNSPGTMFLD<br>Y          | 14 | 43 | 1-39  | 1 | QQSYSTPWT      | 9  | 7  | / | / | / | / | X | 1.4E-07 | / | / | / |
|    | 3.CO6   | 3-09 | 5 | AKDAHDFRSGSGG<br>WFDA       | 17 | 23 | 3-15  | 5 | QQCDNPIT       | 8  | 15 | / | / | / | / | / |         | / | / | / |
|    | 3.DO6   | 4-59 | 4 | ARDSTVFPRIFDS               | 13 | 13 | 3-20  | 1 | QQCGSSPWT      | 9  | 10 | / | / | / | / | X | 2.7E-10 | / | / | / |
|    | 3.EO6*  | 4-04 | 4 | ARKRASTGTLYFDF              | 14 | 30 | 1D-39 | 4 | QQTYSVPLT      | 9  | 24 | X | / | X | / | / |         | / | / | / |
|    | 3.FO4   | 3-30 | 4 | ARDYRHGLIDF                 | 11 | 25 | 2-30  | 5 | MQGTYWPPIT     | 10 | 14 | / | / | / | / | X | 4.5E-10 | X | X | X |
|    | 3.GO3   | 3-74 | 4 | AREPYHPPQFDY                | 12 | 16 | 1D-39 | 4 | QQSYRSPPT      | 9  | 25 | / | / | / | / | X | 2.5E-09 | X | X | X |
|    | 3.GO5   | 4-39 | 6 | SRLQPYTNYGRSH<br>YYFYALDV   | 21 | 20 | 3-11  | 4 | QERSNWPRLT     | 10 | 17 | X | / | X | / | X | 2.6E-07 | X | X | X |
| C3 | 1.BO1   | 1-18 | 4 | ARETLTYCSGGSCY<br>ARLSGNFDH | 23 | 24 | 1-39  | 1 | QQNYRTPWT      | 9  | 14 | / | / | / | / | X | 1.3E-07 | X | / | / |
|    | 1.BO5   | 4-59 | 6 | ARAGTWAELYGMD<br>V          | 14 | 6  | 2-28  | 1 | MQALQTPLT      | 9  | 0  | / | / | / | / | / |         | / | / | / |
|    | 1.CO4   | 3-30 | 4 | TRGALRLAPGGTFT<br>Y         | 15 | 28 | 4-1   | 2 | QQYYSLPYT      | 9  | 13 | / | / | / | / | X | 1.9E-07 | / | / | / |

|        |      |   |                             |    |    |       |   |                |    |    |   |   |   |   |   |         |   |   |   |
|--------|------|---|-----------------------------|----|----|-------|---|----------------|----|----|---|---|---|---|---|---------|---|---|---|
| 1.DO4  | 3-23 | 4 | AARYCRYGDCYPY<br>DY         | 15 | 29 | 3-20  | 2 | LHYDSSPQS      | 9  | 10 | / | / | / | X | / |         | / | / | / |
| 1.FO2  | 3-15 | 3 | TWLLGYCSNGGCS<br>DAFDL      | 18 | 14 | 4-1   | 2 | LQYYNTPYT      | 9  | 8  | / | / | / | / | / |         | / | / | / |
| 1.FO3  | 4-59 | 4 | ARTWEYCTMTSCS<br>PEGGTDF    | 20 | 25 | 1-33  | 3 | QHYDSLGA       | 9  | 8  | / | / | / | / | / |         | / | / | / |
| 1.GO1  | 1-18 | 4 | ARFKVPLYDSSGT<br>DY         | 16 | 26 | 1-6   | 1 | LQDYTPWT       | 9  | 7  | / | / | / | / | / |         | / | / | / |
| 1.GO3  | 3-66 | 4 | ARGLQDDARGVIR<br>ALYY       | 17 | 24 | 3D-15 | 1 | QQYDNWPPW<br>T | 10 | 15 | / | / | / | / | / |         | / | / | / |
| 1.GO5  | 3-30 | 6 | AKEGSGSYDYLGLG<br>PNMDV     | 18 | 10 | 3-11  | 3 | QQRSNWPPIT     | 10 | 3  | / | / | / | / | / |         | / | / | / |
| 1.GO6  | 7-81 | 6 | ARRDGNVWYFDV                | 13 | 62 | 3-11  | 2 | QLRSTWPPYT     | 10 | 15 | / | / | / | X | X | 8.4E-09 | X | / | / |
| 1.2AO2 | 3-49 | 3 | SREFTPVRAFDI                | 12 | 16 | 3-11  | 3 | QHRTNWPLT      | 9  | 8  | / | / | / | / | / |         | / | / | / |
| 1.2BO2 | 4-59 | 4 | ARVDDFIWGTFFDS              | 13 | 25 | 3D-15 | 1 | QQYDGYPPW<br>T | 10 | 15 | / | / | / | / | / |         | / | / | / |
| 1.2BO3 | 4-34 | 5 | ARGFNPSGRGYN<br>WFDP        | 16 | 14 | 1-39  | 1 | QQSYIMPPT      | 9  | 12 | / | / | / | / | X | 3.0E-07 | / | / | / |
| 1.2BO6 | 3-21 | 4 | ASQGPDGDLNY                 | 11 | 21 | 3-20  | 2 | QQYGDSPLLT     | 10 | 8  | / | / | / | / | / |         | / | / | / |
| 1.2DO5 | 3-07 | 4 | VVTPRRDPFDY                 | 11 | 7  | 2-30  | 1 | MQAIHWPWT      | 9  | 4  | / | / | / | / | / |         | / | / | / |
| 1.2EO4 | 3-33 | 4 | ARPYCSSANCFPT<br>YFDF       | 17 | 17 | 3-20  | 4 | QQYSSSLALT     | 10 | 12 | / | / | / | / | X | 3.8E-08 | / | / | / |
| 1.2GO2 | 3-21 | 3 | ARDLTYGDYLVKFA<br>FDI       | 17 | 14 | 1-33  | 5 | QQYDNLPPSIT    | 11 | 9  | X | / | / | / | / |         | / | / | / |
| 1.2GO3 | 3-53 | 4 | ASGAPGRVAFDY                | 12 | 26 | 2-28  | 2 | MQSLQTPYT      | 9  | 8  | / | / | / | / | / |         | / | / | / |
| 2.CO1  | 3-15 | 6 | TTDRITMVRGMLQ<br>YHYHSYDMDV | 23 | 30 | 2-30  | 2 | MQGTLWPT       | 8  | 12 | / | / | / | / | / |         | / | / | / |
| 2.DO3  | 3-13 | 6 | ARDRAYTGQNMDV               | 13 | 32 | 3-11  | 5 | QQRDWPSSIS     | 10 | 15 | / | / | / | / | / |         | / | / | / |
| 2.FO2  | 3-23 | 4 | ATHKGHCTTGTCY<br>FDN        | 16 | 13 | 3-15  | 3 | QQYNNWPPV<br>T | 10 | 7  | / | / | / | / | / |         | / | / | / |
| 2.3BO2 | 4-34 | 4 | ARAGRWWGSYRFL<br>DY         | 15 | 18 | 1-6   | 1 | LQDYNYPWT      | 9  | 8  | X | / | X | X | / |         | / | / | / |
| 2.3CO1 | 3-23 | 4 | AKGVGRIFMVRGF<br>YFDY       | 17 | 21 | 1D-39 | 3 | QQSYSTPHT      | 9  | 9  | X | X | X | X | X | 2.6E-07 | X | / | / |

|    |        |        |   |                          |    |    |       |   |                 |    |    |   |   |   |   |   |         |   |   |   |
|----|--------|--------|---|--------------------------|----|----|-------|---|-----------------|----|----|---|---|---|---|---|---------|---|---|---|
|    | 2.3CO4 | 3-23   | 3 | AKDLPQYGSTYWR<br>GSFDM   | 18 | 10 | 1-9   | 5 | QQLNNYPIT       | 9  | 1  | / | / | / | / | X | 1.8E-08 | X | / | / |
|    | 2.3CO5 | 3-66   | 4 | ATSPPRGGTTYFD<br>Y       | 14 | 9  | 3-11  | 4 | QQRSQLVT        | 8  | 15 | / | X | / | / | X | 3.9E-07 | / | / | / |
|    | 2.3DO6 | 4-59   | 6 | ARDRGYSSGYKNY<br>YYYGMDV | 20 | 9  | 3-11  | 4 | QLRSNSLT        | 8  | 7  | X | / | X | X | / |         | / | / | / |
|    | 2.3EO6 | 1-03   | 4 | ASPGKYQLAFDF             | 12 | 22 | 3-20  | 1 | QQYGSSPPW<br>T  | 10 | 21 | / | / | / | / | / |         | / | / | / |
|    | 2.3FO2 | 3-30   | 6 | AKLPQRLDEGDYY<br>FDMEV   | 18 | 26 | 1-17  | 4 | LQHSTYPLT       | 9  | 15 | / | / | / | / | X | 5.4E-10 | X | X | X |
|    | 2.3FO3 | 3-66   | 4 | AYDSSGYRTYQFD<br>H       | 14 | 25 | 1D-39 | 5 | QQSDTMPLT       | 9  | 14 | X | X | X | X | / |         | / | / | / |
|    | 3.4AO5 | 3-30   | 4 | AKDFWIAYYYGSG<br>PLDN    | 17 | 18 | 3-20  | 2 | QQYGSSFT        | 8  | 10 | X | X | X | / | X | 2.3E-07 | / | / | / |
|    | 3.4BO3 | 3-30   | 6 | AKVRIGLQSFVYY<br>GMDV    | 18 | 12 | 1-33  | 2 | QQYDNLPT        | 9  | 9  | / | / | / | / | / |         | / | / | / |
|    | 3.4BO5 | 4-30-4 | 3 | AREVDLARTTDAFD<br>I      | 15 | 32 | 3-15  | 4 | QHYNWPLT        | 9  | 9  | / | / | / | / | / |         | / | / | / |
|    | 3.4CO2 | 3-21   | 4 | ARERGYSYGLDY             | 12 | 9  | 1D-39 | 2 | QQSYTPHT        | 9  | 8  | / | / | / | / | X | 1.2E-08 | X | / | / |
|    | 3.4CO4 | 5-51   | 6 | ARQKVGATSYYYY<br>NYGLDV  | 19 | 15 | 3-15  | 2 | QQYDDWPLYT      | 10 | 5  | / | / | / | / | X | 8.0E-10 | / | / | / |
|    | 3.4CO6 | 3-23   | 5 | AKFPTIFGVVDS             | 12 | 14 | 2-28  | 1 | MQARQTPRT       | 9  | 7  | X | / | X | X | X | 2.9E-08 | X | / | / |
|    | 3.4EO4 | 3-74   | 4 | ARETLRGYSGYVS<br>FEY     | 16 | 21 | 1D-39 | 4 | QQSYSIPLT       | 9  | 15 | X | / | X | / | X | 3.7E-07 | X | / | / |
|    | 3.4FO6 | 4-39   | 5 | ARRQYTNSPFDP             | 12 | 20 | 1D-39 | 5 | QQGYSTPIT       | 9  | 17 | / | / | / | / | X | 4.5E-10 | X | / | / |
|    | 3.4GO3 | 3-43   | 4 | ATGGGSWYESGA<br>GSLQYFDY | 20 | 18 | 1D-39 | 3 | QQSYNTPFT       | 9  | 11 | / | / | / | / | / |         | / | / | / |
| C4 | 2.CO2  | 4-61   | 4 | ARGRVPYSSSSGW<br>F       | 14 | 21 | 1-39  | 2 | QQSFTTPQT       | 9  | 9  | / | / | / | / | X | 9.7E-08 | / | / | / |
|    | 2.CO3  | 3-30   | 4 | ARDMGTATGTGFD<br>H       | 14 | 20 | 3-11  | 2 | HQRSNWPPM<br>CT | 11 | 6  | X | X | X | X | / |         | / | / | / |
|    | 2.EO6  | 4-34   | 4 | ARGPADVARYFDY            | 13 | 10 | 3-15  | 5 | QQYNVWLRI<br>T  | 11 | 5  | X | / | X | X | / |         | / | / | / |
|    | 2.GO3  | 3-23   | 6 | VKGPTSYPYLLSGLDV         | 14 | 31 | 2-28  | 1 | MQAELWT         | 8  | 6  | / | / | X | X | X | 4.5E-07 | / | / | / |
|    | 2.2AO1 | 1-18   | 6 | ATYSRAYFYGMDV            | 13 | 21 | 1-5   | 2 | QQYNSYSCS       | 9  | 5  | / | / | X | / | / |         | / | / | / |



|    |         |      |   |                                |    |    |       |   |                 |    |    |   |   |   |   |   |         |   |   |
|----|---------|------|---|--------------------------------|----|----|-------|---|-----------------|----|----|---|---|---|---|---|---------|---|---|
|    | 2.2AO6  | 3-53 | 5 | ARDRHCSSGGSCYGA                | 14 | 8  | 2-28  | 5 | MQARQTPIT       | 9  | 1  | / | / | / | / | / | /       | / | / |
|    | 2.2BO2  | 4-04 | 6 | ARGPGEAVAGTLR<br>WGPKEYHHNHRLD | 27 | 31 | 3-20  | 3 | QHFGGSPLFT      | 10 | 11 | X | X | X | X | / | /       | / | / |
|    | 2.2BO6  | 3-15 | 6 | MRDFYASGITRGDV                 | 14 | 24 | 2-28  | 1 | MQPLYTPRT       | 9  | 14 | / | / | / | X | / | /       | / | / |
|    | 2.2CO2  | 3-74 | 4 | AAGTAY                         | 6  | 28 | 2-30  | 2 | LQGTHWPYT       | 9  | 16 | / | / | / | / | / | /       | / | / |
|    | 2.2CO3  | 5-51 | 4 | ARQSIYDSSGYYYP<br>FDY          | 17 | 23 | 3-20  | 1 | QQYGDSPT        | 9  | 12 | / | / | / | / | / | /       | / | / |
|    | 2.2CO4  | 3-33 | 4 | VRSKELHENSIFY<br>GY            | 15 | 31 | 1-5   | 1 | QQYNSYWT        | 8  | 18 | / | / | / | / | / | /       | / | / |
|    | 2.2DO1  | 3-30 | 6 | AKDRRRDSLPRYF<br>DWLVVYNGMDV   | 24 | 27 | 2D-29 | 4 | MQSLQVPLT       | 9  | 20 | / | / | / | / | X | 1.3E-08 | X | / |
|    | 3.2CO4  | 3-53 | 5 | ARGGGASYEFWS<br>GYDL           | 16 | 21 | 4-1   | 1 | QQYNTPT         | 9  | 7  | / | / | / | / | / | /       | / | / |
|    | 3.2FO3  | 3-15 | 4 | STSGGSTWPPY                    | 11 | 21 | 1-33  | 2 | QQYDDLPT        | 9  | 13 | / | / | / | / | / | /       | / | / |
|    | 3.2GO4  | 3-30 | 6 | ASGGGGLYCSGRD<br>CLYYALDV      | 21 | 25 | 1-33  | 2 | QQYDDLPT        | 9  | 13 | / | / | X | X | / | /       | / | / |
|    | 3.3AO4* | 4-04 | 4 | ARIAFVSSWYGYFD<br>S            | 15 | 30 | 3-15  | 1 | QQYDIWWT        | 8  | 5  | / | / | / | / | X | 2.1E-10 | / | / |
|    | 3.3BO2* | 4-04 | 4 | ARVAYSGSWYGYF<br>DF            | 15 | 21 | 3-15  | 1 | QQYSVWWT        | 8  | 10 | / | / | / | / | X | 2.1E-10 | / | / |
|    | 3.3BO3  | 4-61 | 4 | ARNPPLDYSHSNR<br>AYFFDY        | 19 | 18 | 1-17  | 4 | LQHNTYPLT       | 9  | 8  | / | / | / | / | X | 2.7E-09 | / | / |
|    | 3.3CO5  | 1-18 | 6 | ARGEPRLVAPYALY<br>SYHGMDV      | 21 | 16 | 3-11  | 4 | QQRSDWPGE<br>LT | 11 | 6  | X | X | X | / | X | 1.3E-07 | / | / |
|    | 3.3FO4  | 3-15 | 4 | STSGTTLGAAVEVF                 | 14 | 54 | 4-1   | 4 | QQFFSFPQT       | 9  | 30 | / | / | / | / | X | 3.4E-07 | / | / |
| C5 | 1.AO3   | 1-02 | 4 | TRGVGSPNYFDS                   | 12 | 10 | 3-11  | 1 | QQYGKSPRT       | 9  | 12 | / | / | / | / | / | /       | / | / |
|    | 1.AO4   | 3-23 | 5 | AKDNGPSDGDWFE<br>S             | 14 | 38 | 2-24  | 1 | MQVSHFPRA       | 9  | 13 | / | / | / | / | / | /       | / | / |
|    | 1.BO5   | 1-02 | 3 | ARLLGIQLWLHAFDI                | 15 | 14 | 1-5   | 1 | QQYNNFWT        | 8  | 5  | / | / | / | / | / | /       | / | / |
|    | 1.CO5   | 4-61 | 6 | ARGARDFPRYVNY<br>HMDV          | 17 | 25 | 2-28  | 2 | MQGLQSPYS       | 9  | 11 | / | / | / | / | X | 5.6E-10 | X | / |
|    | 1.DO2   | 3-23 | 4 | AKTLKGGYDYGLD<br>S             | 14 | 23 | 1-39  | 3 | QQSYDTLT        | 8  | 14 | / | / | / | / | / | /       | / | / |

|    |        |        |   |                               |    |    |       |   |                 |    |    |   |   |   |   |   |         |   |   |   |
|----|--------|--------|---|-------------------------------|----|----|-------|---|-----------------|----|----|---|---|---|---|---|---------|---|---|---|
|    | 1.DO4  | 5-a    | 5 | ARAAGGTLGWFDP                 | 13 | 20 | 1D-39 | 4 | QQSYSTPLT       | 9  | 11 | / | / | / | / | X | 1.1E-06 | / | / | / |
|    | 1.EO2  | 3-07   | 3 | ARGGRRGAYYDFWS<br>AYIDI       | 18 | 30 | 1D-39 | 2 | QQSYHTPYT       | 9  | 16 | / | / | / | / | X | 2.5E-07 | X | / | / |
|    | 1.FO1  | 4-30-4 | 6 | AKTKTMSYFYTYM<br>DV           | 15 | 33 | 3-15  | 5 | QQHNDWPPIT      | 10 | 17 | X | X | X | X | X | 9.3E-09 | X | X | / |
|    | 1.FO5  | 3-33   | 3 | ARGHLGTTGAFDI                 | 13 | 6  | 1-5   | 4 | QQYKSYPLT       | 9  | 3  | / | / | X | / | / |         | / | / | / |
|    | 1.FO6  | 4-61   | 5 | ARSEGSSSFEWFD<br>P            | 14 | 19 | 2-28  | 2 | MQALQSPYS       | 9  | 9  | / | / | / | / | / |         | / | / | / |
|    | 1.GO2  | 3-21   | 4 | ARDRSSGWDPFDS                 | 13 | 15 | 1-NL1 | 1 | QQYYTTPPWT      | 10 | 5  | X | X | X | X | X | 5.7E-08 | X | / | / |
|    | 1.GO5  | 1-03   | 6 | SRDSLIRSLEWSNP<br>VRNFHFSYMDV | 25 | 20 | 1-5   | 5 | QQYNSFHT        | 8  | 9  | X | X | X | X | X | 1.8E-07 | X | / | / |
|    | 2.3GO1 | 3-21   | 3 | ARDPYDSGWSVG<br>RFGFDI        | 18 | 15 | 1-9   | 2 | QQLNSYPRS       | 9  | 3  | / | / | / | / | / |         | / | / | / |
| C6 | 1.AO6  | 3-13   | 3 | AKALRGRRWLQSS<br>DAFDI        | 18 | 36 | 1-39  | 1 | QQSYTSRTRT      | 10 | 17 | / | / | / | / | X | 2.7E-08 | / | / | / |
|    | 1.BO2  | 4-31   | 6 | ARDRLTDFWSGYS<br>VMDV         | 17 | 15 | 4-1   | 1 | QQYYSIPT        | 8  | 12 | / | / | / | / | / |         | / | / | / |
|    | 1.CO1  | 3-30   | 4 | ARVASMILVDIKYYF<br>DY         | 17 | 17 | 3-15  | 1 | QQYNEWPRT       | 9  | 4  | X | X | X | X | X | 2.4E-09 | X | / | X |
|    | 1.CO3  | 3-23   | 6 | AKDITEYTYGLGFG<br>YFYDYGLDV   | 23 | 15 | 1-9   | 3 | QQLNSSPFT       | 9  | 8  | / | X | X | X | / |         | / | / | / |
|    | 1.CO4  | 3-30   | 6 | AKVLYDILTGYRYG<br>MDV         | 17 | 10 | 1-12  | 3 | QQANSFPFT       | 9  | 5  | X | X | X | X | X | 1.4E-07 | X | / | / |
|    | 1.DO2  | 1-69   | 4 | ANMSTVTSDL                    | 11 | 38 | 2-28  | 2 | MQALQIPFA       | 9  | 12 | / | / | / | / | / |         | / | / | / |
|    | 1.DO5  | 3-30   | 3 | ARERNFFHFGAFD<br>L            | 14 | 21 | 1-5   | 2 | QQYDTFSS        | 8  | 10 | / | / | / | / | / |         | / | / | / |
|    | 1.EO1  | 3-30   | 4 | AKDQRGSSGWER<br>GHGFDY        | 18 | 7  | 2-28  | 1 | MQPLQTPWT       | 9  | 0  | / | / | / | / | / |         | / | / | / |
|    | 1.EO2  | 1-69   | 4 | ARDEYYDSRGYPV<br>GGHFDN       | 19 | 15 | 3-11  | 1 | QQRSNWPRT       | 9  | 5  | / | / | / | / | X | 9.6E-07 | / | / | / |
|    | 1.EO4  | 1-69   | 5 | ASPPPESSGYLGW<br>FDP          | 16 | 27 | 3-15  | 2 | QQYYNWPPR<br>YT | 11 | 9  | X | / | X | / | X | 1.1E-06 | / | / | / |
|    | 1.FO5  | 1-46   | 3 | ARAGYYYDSYGLD<br>AFNI         | 17 | 8  | 1-9   | 2 | QQLNSYPYT       | 9  | 1  | / | / | / | / | X | 2.6E-07 | / | / | / |
|    | 1.GO3  | 3-09   | 4 | VKGRGGVYTGYP<br>RYLDY         | 18 | 15 | 1D-39 | 3 | QQSYSSPRT       | 9  | 11 | X | X | X | / | X | 1.9E-07 | X | / | / |

|        |        |   |                                          |    |    |       |   |                        |    |    |   |   |   |   |   |         |   |   |   |
|--------|--------|---|------------------------------------------|----|----|-------|---|------------------------|----|----|---|---|---|---|---|---------|---|---|---|
| 1.GO4  | 3-09   | 4 | AKAAKPGPARAPF<br>DS                      | 15 | 20 | 2-28  | 4 | MQALETPLT              | 9  | 9  | / | / | / | / | X | 4.6E-07 | X | / | / |
| 1.GO5  | 4-31   | 4 | ARVRIEYYYYWSSR<br>PNKPGAFDY              | 22 | 10 | 1-33  | 4 | QQYDNLPLT              | 9  | 2  | / | / | / | / | / |         | / | / | / |
| 1.GO6  | 4-61   | 4 | ARTNYYDSSGY                              | 11 | 9  | 1D-39 | 4 | QQSYSIPLT              | 9  | 6  | / | / | / | / | X | 5.0E-07 | X | / | / |
| 2.AO5  | 7-04-1 | 4 | ARVKYGSYSIY                              | 12 | 21 | 4-1   | 2 | LQYFTNTQS              | 9  | 16 | / | / | / | / | / |         | / | / | / |
| 2.BO1  | 3-09   | 3 | TKPYLMRSTFDI                             | 12 | 17 | 3-20  | 2 | QQYETAPYT              | 9  | 12 | / | / | / | / | X | 3.2E-07 | X | / | / |
| 2.CO1  | 3-15   | 4 | VTDFSGRRPY                               | 10 | 18 | 1-5   | 3 | QLYNDYSGFT<br>QHYNWPPR | 10 | 8  | / | / | / | / | X | 2.0E-08 | X | X | X |
| 2.CO2  | 3-74   | 4 | ASAKGGYSYGNFD<br>Y                       | 14 | 9  | 3D-15 | 2 | YT                     | 11 | 2  | / | X | X | / | X | 1.1E-06 | / | / | / |
| 2.CO3  | 3-64   | 3 | GKDLVFGAAVPDV<br>GPDGCDI                 | 20 | 71 | 1D-39 | 4 | QQTYSIPLT              | 9  | 11 | / | / | / | X | / |         | / | / | / |
| 2.DO1  | 1-18   | 5 | ARDRGSILGSDPW<br>FDP                     | 16 | 17 | 2-30  | 1 | MQGTHWPLT              | 9  | 7  | / | / | / | / | X | 3.4E-08 | X | / | / |
| 2.DO2  | 3-30-3 | 6 | ATRSVGATGYLSW<br>GPKDYSYNDVDV            | 25 | 38 | 1-17  | 1 | LQHNSYPWT              | 9  | 10 | X | X | X | X | X | 9.5E-08 | X | / | / |
| 2.EO1  | 1-69   | 4 | ARSPDSYDGSGYP<br>FPH                     | 16 | 26 | 4-1   | 3 | QQYYSSPPT              | 9  | 11 | / | / | / | / | / |         | / | / | / |
| 2.EO4  | 3-13   | 3 | ARAPGDDIGAFDI                            | 13 | 18 | 1-5   | 1 | QQYNSYFTWT             | 10 | 13 | / | / | / | / | / |         | / | / | / |
| 2.FO2  | 1-18   | 4 | AGIRTYSGYDYFDY                           | 14 | 6  | 1-12  | 1 | QQANSFPVT              | 9  | 7  | / | / | / | / | / |         | / | / | / |
| 2.FO4  | 3-23   | 4 | AKGGDYALGTYL<br>EQFDY                    | 18 | 9  | 4-1   | 4 | HQYYSTPLT<br>MQGSYWPPF | 9  | 4  | / | / | / | / | / |         | / | / | / |
| 2.FO6  | 3-23   | 4 | VQLGNYDY                                 | 8  | 35 | 2-30  | 3 | T                      | 10 | 18 | / | / | / | / | / |         | / | / | / |
| 2.GO4  | 4-39   | 4 | ASSRSNSYGHDF<br>DY                       | 15 | 10 | 1-6   | 1 | LQDYNYPWT              | 9  | 7  | / | / | / | / | / |         | / | / | / |
| 2.2BO5 | 3-07   | 6 | AREGQTVTPPKYH<br>YGMDV                   | 18 | 11 | 3-20  | 2 | QLYGSSANT              | 9  | 10 | / | / | / | / | / |         | / | / | / |
| 2.2CO6 | 3-23   | 4 | AKKSPNDYDHY                              | 11 | 21 | 1-5   | 1 | QQYNSYSGT              | 9  | 15 | / | / | / | / | X | 1.0E-08 | X | X | X |
| 2.2DO3 | 3-09   | 3 | VKATTYQYDRDGF<br>DV                      | 15 | 6  | 4-1   | 4 | QQYYTTPLT              | 9  | 5  | / | / | / | / | / |         | / | / | / |
| 2.2EO5 | 1-69   | 6 | AKVRTPGPPTLPE<br>MEGLFGDDYLADL<br>CYGMDV | 32 | 27 | 2-28  | 1 | MQSLQTPQT              | 9  | 13 | / | / | X | / | X | 5.6E-10 | X | X | X |

|    |       |      |   |                           |    |    |       |   |                |    |    |   |   |   |   |   |         |   |   |   |
|----|-------|------|---|---------------------------|----|----|-------|---|----------------|----|----|---|---|---|---|---|---------|---|---|---|
|    | 3.AO2 | 3-07 | 6 | ARDPYNRNEAGYG<br>MDV      | 16 | 27 | 2-30  | 2 | MQGTKWPYT      | 9  | 8  | / | / | / | / | / |         | / | / | / |
|    | 3.AO6 | 3-48 | 3 | AREVDTYGDEGDA<br>FDV      | 16 | 6  | 2-30  | 2 | MQGTHWPGY<br>T | 10 | 2  | / | / | / | / | / |         | / | / | / |
|    | 3.BO2 | 4-34 | 4 | ARGVTMLRGARPD<br>VRQPKYDY | 21 | 14 | 1-39  | 1 | QQSYTPRT       | 9  | 8  | X | X | X | X | X | 2.5E-07 | X | / | / |
|    | 3.BO4 | 1-03 | 5 | ARAGYSSVEEFGW<br>FDP      | 16 | 20 | 4-1   | 2 | QQYYSTPQT      | 9  | 5  | / | / | / | / | / |         | / | / | / |
|    | 3.BO5 | 1-18 | 5 | ARDPGYCTTTDCY<br>WIWFDS   | 19 | 10 | 4-1   | 2 | QQHYSTPYT      | 9  | 3  | / | / | / | / | / |         | / | / | / |
|    | 3.BO6 | 1-08 | 5 | ARGLRGQFLVLGG<br>NWFDP    | 18 | 24 | 2-24  | 2 | MQTTQFPYT      | 9  | 34 | / | / | / | / | / |         | / | / | / |
|    | 3.CO4 | 3-33 | 6 | GKDSLEVAVMTGTF<br>GLDV    | 18 | 15 | 3-11  | 1 | QQRVNWPLT      | 9  | 8  | / | / | / | / | / |         | / | / | / |
|    | 3.CO5 | 3-64 | 4 | ARDRYCSSTNCYA<br>PLSY     | 17 | 2  | 4-1   | 4 | QQYYSTPLT      | 9  | 1  | / | / | / | / | / |         | / | / | / |
|    | 3.DO1 | 3-30 | 4 | VRPGRHCSSTSCY<br>AHFDS    | 18 | 14 | 4-1   | 3 | QQYYNTPLT      | 9  | 8  | / | / | / | / | / |         | / | / | / |
|    | 3.DO2 | 3-21 | 4 | AREWGHYDTRGEF<br>DF       | 15 | 23 | 3-15  | 4 | QQYNNWPPLT     | 10 | 5  | / | / | / | / | / |         | / | / | / |
|    | 3.FO3 | 3-66 | 4 | VRQSYDGGVWGH<br>YDS       | 15 | 43 | 4-1   | 4 | QQFYNNPST      | 9  | 10 | / | / | / | / | X | 9.2E-08 | / | / | / |
| C7 | 2.BO4 | 3-66 | 6 | AGDPILRNGMDV              | 12 | 24 | 3-11  | 4 | QQRHSWPRT      | 9  | 16 | / | / | / | / | / |         | / | / | / |
|    | 2.DO2 | 3-09 | 3 | AKGENNWNDPDAF<br>DI       | 15 | 0  | 1-16  | 4 | QQSNEKPLT      | 9  | 10 | / | / | / | / | X | 1.4E-06 | X | / | / |
|    | 2.FO3 | 3-15 | 4 | ATRGPGRMYFNY              | 12 | 16 | 3-20  | 1 | QQYVTSPWT      | 9  | 4  | / | / | / | / | / |         | / | / | / |
|    | 2.GO5 | 3-07 | 3 | ARQWELLEWVDAF<br>DI       | 15 | 5  | 1D-39 | 2 | QQSYSTPYT      | 9  | 1  | / | / | / | / | / |         | / | / | / |
|    | 2.GO6 | 1-24 | 4 | ATDYNY                    | 6  | 19 | 1-16  | 4 | QQYSSYPLT      | 9  | 13 | / | / | / | / | / |         | / | / | / |
|    | 3.AO1 | 3-48 | 4 | AREAYYGSGSYKF             | 13 | 26 | 1-33  | 3 | QQYDSLPT       | 9  | 12 | / | / | / | / | / |         | / | / | / |
|    | 3.AO5 | 3-33 | 6 | ARDGFSDYDTYYN<br>GIDV     | 17 | 17 | 3-11  | 2 | QQRFNGLCS      | 9  | 6  | X | X | X | X | X | 6.5E-09 | X | X | X |
|    | 3.CO2 | 4-61 | 4 | ARDNVVSLGRFGE<br>FALYIDY  | 20 | 22 | 1-39  | 5 | QQSYGIPLT      | 9  | 19 | / | / | / | / | X | 5.0E-08 | X | / | / |
|    | 3.DO3 | 1-46 | 4 | ATVPTGAGDY                | 10 | 47 | 1-5   | 3 | QLYNDYSGFT     | 10 | 10 | / | / | / | / | X | 7.1E-07 | X | X | / |
|    | 3.DO6 | 1-69 | 4 | ARAAAYILTGTLHF            | 14 | 21 | 3-15  | 4 | QQYNEWPSLT     | 10 | 9  | / | / | / | / | / |         | / | / | / |

|    |        |      |   |                           |    |    |       |   |                 |    |    |   |   |   |   |   |         |   |   |   |
|----|--------|------|---|---------------------------|----|----|-------|---|-----------------|----|----|---|---|---|---|---|---------|---|---|---|
|    | 3.FO2  | 4-59 | 4 | ARGGRPMGSSSFY<br>YFDY     | 17 | 29 | 1D-39 | 4 | QQSHTSPLT       | 9  | 27 | / | / | / | / | X | 3.9E-07 | / | / | / |
|    | 3.GO2  | 3-74 | 4 | IRVECC                    | 6  | 21 | 1-5   | 4 | QHYYDSPLT       | 9  | 17 | / | / | / | / | / |         | / | / | / |
|    | 3.2AO2 | 4-34 | 4 | ARGYDYVWGSYR<br>RRPYFDY   | 20 | 0  | 1-5   | 1 | QQYNSYSLT       | 9  | 0  | X | X | X | X | X | 2.3E-07 | X | / | / |
|    | 3.2AO3 | 3-33 | 4 | ARGREYCGSSTCY<br>DVFDY    | 18 | 20 | 1-9   | 1 | QQLNSYPRT       | 9  | 14 | / | / | / | / | / |         | / | / | / |
|    | 3.2BO4 | 3-48 | 4 | ARSHRVTSNVPDY             | 13 | 19 | 3-11  | 2 | QQRSNWPFM<br>YA | 11 | 7  | / | / | / | / | X | 1.7E-10 | / | / | / |
| C8 | 1.AO6  | 1-08 | 5 | ARGKSTITTYWFDP            | 14 | 8  | 4-1   | 2 | QQYYSNPYT       | 9  | 9  | / | / | / | / | X | 6.0E-07 | / | / | / |
|    | 1.BO2  | 3-30 | 4 | AKDLVRYFEWGA<br>D         | 14 | 13 | 2-29  | 1 | MQGIHLPWT       | 9  | 11 | X | / | / | X | X | 5.9E-08 | X | / | / |
|    | 1.BO4  | 4-59 | 6 | ARLGFGEVFSFKR<br>YYYYGLDV | 21 | 17 | 3-20  | 3 | QQYGSSVLT       | 9  | 19 | X | X | X | X | X | 3.2E-07 | X | / | / |
|    | 1.DO5  | 4-59 | 5 | ARGGSSGRHGWF<br>DP        | 14 | 29 | 3-20  | 4 | QQYGSLPLT       | 9  | 16 | X | / | / | / | / |         | / | / | / |
|    | 1.FO3  | 3-72 | 6 | ARGSNYYYGMDV              | 12 | 8  | 2-30  | 1 | MQGIDWPWT       | 9  | 15 | / | / | / | / | / |         | / | / | / |
|    | 1.FO6  | 3-72 | 4 | VRWTQGACDC                | 10 | 17 | 3-11  | 1 | QHRSNWPET       | 9  | 3  | X | / | / | / | / |         | / | / | / |
|    | 1.GO1  | 4-39 | 6 | ARIAVEGLDV                | 10 | 28 | 1-5   | 4 | QEYNSYSLT       | 9  | 2  | / | / | / | / | X | 1.0E-06 | / | / | / |
|    | 1.GO2  | 1-2  | 5 | GRDGRNIVEIRAAV<br>SDR     | 17 | 49 | 3-15  | 3 | HQYYKWPS        | 8  | 13 | X | / | X | / | / |         | / | / | / |
|    | 1.2AO2 | 4-61 | 4 | ARGPSLVDF                 | 9  | 11 | 1D-39 | 2 | QQSYNSPYT       | 9  | 8  | / | X | / | X | X | 9.5E-08 | X | / | / |
|    | 1.2AO4 | 3-23 | 6 | VKDRGTMFRGAVY<br>GMDV     | 17 | 6  | 1-17  | 2 | LQHNSYPYT       | 9  | 1  | X | X | / | / | X | 4.0E-07 | X | / | / |
|    | 1.2BO5 | 4-61 | 4 | ARDLVRLTSTGPTY<br>YFDS    | 18 | 27 | 1-33  | 3 | QHYSLSPLT       | 9  | 17 | / | / | / | / | / |         | / | / | / |
|    | 1.2BO6 | 3-49 | 5 | TRDRYKWNLYLVNE            | 13 | 10 | 1-39  | 1 | QQSYSIPWT       | 9  | 9  | / | / | / | / | X | 3.0E-07 | / | / | / |
|    | 1.2CO3 | 3-15 | 4 | TVDDSAYSISQIDY            | 13 | 16 | 2-28  | 1 | VQTLQTTWT       | 8  | 6  | / | / | / | / | X | 3.5E-07 | X | / | / |
|    | 1.2DO3 | 3-07 | 4 | ARLGIISGSLNDY             | 14 | 18 | 1-16  | 1 | QQYISYPPT       | 9  | 12 | / | / | / | / | / |         | / | / | / |
|    | 1.2DO5 | 3-23 | 4 | AKDKIVGSIWVYFY<br>DY      | 16 | 3  | 3-20  | 1 | QQYARSPWT       | 9  | 8  | / | / | / | / | X | 2.5E-07 | / | / | / |
|    | 1.2DO6 | 3-23 | 4 | AKREGGWYQHYP<br>DY        | 14 | 15 | 3-20  | 2 | QQYGSSPYT       | 9  | 3  | / | / | / | / | / |         | / | / | / |
|    | 1.2EO6 | 4-59 | 4 | ARVVTVAGLVN               | 11 | 9  | 1-9   | 4 | QQLNSYPRT       | 9  | 2  | / | / | / | X | X | 2.9E-07 | X | / | / |
|    | 1.2GO2 | 5-51 | 4 | VRGASSNLFYD               | 11 | 15 | 1-5   | 1 | QQYNTYSWT       | 9  | 12 | / | / | / | / | X | 3.4E-07 | X | / | / |

|        |      |   |                                         |    |    |       |   |                       |    |    |   |   |   |   |   |         |   |   |   |
|--------|------|---|-----------------------------------------|----|----|-------|---|-----------------------|----|----|---|---|---|---|---|---------|---|---|---|
| 1.2GO3 | 1-02 | 4 | VREGPVRGLTPPD<br>Y                      | 14 | 17 | 3-11  | 4 | QQRSDWPLT             | 9  | 7  | / | / | / | / | X | 6.1E-07 | X | / | / |
| 2.BO6  | 3-15 | 4 | TTGSGTIQLKLGGE<br>Y                     | 15 | 20 | 4-1   | 3 | QQYYSIPFT             | 9  | 18 | / | / | / | / | / |         | / | / | / |
| 2.CO3  | 3-23 | 6 | VKRGWFGELFGNY<br>GMDV                   | 17 | 39 | 1-9   | 4 | QQLESYPLT             | 9  | 10 | X | / | X | / | X | 8.2E-08 | X | / | / |
| 2.CO4  | 3-23 | 4 | ANTYASRNNIKFLG<br>Y                     | 15 | 34 | 1-39  | 1 | LQTYSDPWT<br>QQRSFPPR | 9  | 19 | / | / | / | / | X | 1.1E-06 | / | / | / |
| 2.EO1  | 4-39 | 4 | ARGPTSRWAHFDY<br>TKVDSSPFFDYGM          | 13 | 17 | 3-11  | 2 | YT                    | 11 | 2  | / | / | / | / | / |         | / | / | / |
| 2.EO6  | 3-23 | 6 | DV                                      | 15 | 24 | 1-17  | 1 | LQHNSYPWT             | 9  | 13 | / | / | / | / | / |         | / | / | / |
| 2.FO2  | 1-69 | 4 | SRDSNGGGAYDS                            | 12 | 23 | 3D-15 | 4 | QQYNSWLRA             | 9  | 10 | / | / | / | / | X | 4.9E-09 | X | / | X |
| 2.FO6  | 3-09 | 5 | TKDVGITTAAGS                            | 13 | 20 | 3-15  | 1 | QQYNHWPLT             | 9  | 15 | / | / | / | / | / |         | / | / | / |
| 2.GO1  | 3-49 | 4 | VSDDESPTVDFD<br>Y                       | 14 | 38 | 2D-29 | 4 | MQNMQLPPT             | 9  | 14 | / | / | / | / | / |         | / | / | / |
| 2.GO2  | 3-23 | 6 | AKDRGRAAVVDYY<br>YSMDV                  | 18 | 17 | 1-8   | 1 | QQYYSYPRT             | 9  | 8  | X | X | X | / | / |         | / | / | / |
| 2.GO5  | 4-59 | 6 | ARGNWGPPNYPYY<br>YGMDV                  | 18 | 30 | 2-28  | 4 | MQAVQGLPVT            | 10 | 19 | / | / | / | / | / |         | / | / | / |
| 3.AO2  | 3-30 | 4 | AKDLLPGWAAGGR<br>YYFDN                  | 18 | 25 | 1-16  | 4 | QQYDRYPLT             | 9  | 9  | X | X | X | / | X | 3.0E-07 | X | / | / |
| 3.CO4  | 4-59 | 5 | ARDRSPLGNWLDP                           | 13 | 21 | 1-NL1 | 4 | QQYYTTPLT             | 9  | 11 | / | / | / | / | / |         | / | / | / |
| 3.FO3  | 3-21 | 6 | ARAPYDSSGYDYIF<br>YYDAMDV               | 21 | 10 | 1-5   | 1 | QQYKSYSRT             | 9  | 3  | / | / | / | / | X | 1.4E-06 | / | / | / |
| 3.GO4  | 4-04 | 4 | AREPKAQASRDFD                           | 13 | 36 | 1-33  | 4 | QRSDDLPLA             | 9  | 13 | / | / | X | / | X | 9.0E-07 | / | / | / |
| 3.2AO6 | 3-74 | 3 | AKSYKMNYSAFDI                           | 13 | 32 | 1-12  | 4 | QQSNDYPLT             | 9  | 18 | / | / | / | / | X | 1.1E-09 | X | / | X |
| 3.2BO6 | 3-23 | 3 | ARDRPKMRTTRRV<br>SDVLSGPKGRGGS<br>YVFDI | 31 | 39 | 4-1   | 4 | QQYYSPLT              | 9  | 13 | X | X | X | X | / |         | / | / | / |
| 3.2EO5 | 3-11 | 4 | ARGSMRFSEWSPL<br>GF                     | 15 | 22 | 3-20  | 2 | QQCGSPPT              | 9  | 17 | / | / | / | / | X | 1.4E-07 | X | / | / |
| 3.2FO6 | 4-61 | 4 | ARERGYSGGGSLG<br>H                      | 14 | 32 | 1-5   | 2 | QYYDSFSMYT            | 10 | 11 | / | / | / | / | / |         | / | / | / |

X indicates reactivity in ELISA; \*next to antibody names refers to clonally related members

<sup>a</sup>K<sub>D</sub> values estimated by Scatchard plot analyses of virus ELISA data
