# Supplementary material for: High Affinity Antibodies against Influenza Characterize the Plasmablast Response in SLE Patients After Vaccination
Source: PubMed Central journal article supplement (PMC4423960; doi:10.1371/journal.pone.0125618), 2015-05-07
Supplement: pone.0125618.s007.pdf [file pone.0125618.s007.pdf]

**S4 Table.** Array data on cross-reactivity of rHA-specific antibodies

**H1N1 rHA-specific antibodies**

| Antibody  | A/New Caledonia/20/99 | A/Solomon Islands/03/06 | A/Brisbane/59/07 | A/South Carolina/1/18 | A/Puerto Rico/8/34 | A/USSR/90/77 | A/Texas/36/91 | A/California/04/09 |
|-----------|-----------------------|-------------------------|------------------|-----------------------|--------------------|--------------|---------------|--------------------|
| S1 3.2AO4 | 17.3808               | 6.44266                 | 1.89806          | 5.81614               | 6.4423             | 1.56592      | 30.3477       | 27.9188            |
| S1 3.2AO6 | 4.28503               | 11.2207                 | 1.68479          | 12.5704               | 9.1674             | 3.31706      | 1.84405       | 0.36258            |
| S10 1.EO2 | 20.5585               | 45.9309                 | 9.55428          | 38.8368               | 29.6245            | 6.90352      | 7.79768       | 7.1066             |
| S10 1.G03 | 5.63312               | 15.9679                 | 3.99872          | 29.0807               | 19.9171            | 3.94006      | 2.31823       | 1.95794            |
| S10 2.CO3 | 1.01107               | 13.9334                 | 4.55321          | 9.94371               | 4.89765            | 11.8707      | 1.00105       | 1.74039            |
| S10 2.GO1 | 3.89986               | 23.2429                 | 7.69887          | 25.7036               | 22.5166            | 9.41236      | 9.32561       | 6.88905            |
| S2 2.CO4  | 9.9663                | 14.0567                 | 1.93005          | 83.8649               | 9.19252            | 4.32733      | 31.7176       | 65.6998            |
| S2 2.EO3  | 38.8541               | 46.5783                 | 5.68351          | 43.3396               | 3.30278            | 6.02795      | 100           | 1.45033            |
| S2 2.FO4  | 9.43669               | 11.4982                 | 2.14331          | 9.38086               | 6.71857            | 2.89611      | 17.3867       | 2.6831             |
| S3 2.AO4  | 15.7439               | 10.0185                 | 1.68479          | 10.6942               | 7.44694            | 2.30679      | 2.73973       | 1.08774            |
| S3 2.CO2  | 100                   | 84.7102                 | 6.09938          | 60.9756               | 19.7287            | 1.26284      | 10.8535       | 3.04569            |
| S3 2.FO1  | 12.181                | 17.8792                 | 1.15163          | 11.257                | 2.39859            | 0.33676      | 1.94942       | 0.58013            |
| S3 2.FO4  | 8.6182                | 9.4328                  | 0.98102          | 57.0356               | 7.03253            | 2.27311      | 20.8641       | 57.578             |
| S3 2.FO6  | 2.11844               | 5.57953                 | 1.43954          | 7.87992               | 4.54603            | 1.34703      | 0.79031       | 1.01523            |
| S3 2.GO2  | 26.1435               | 12.762                  | 1.59949          | 7.87992               | 1.56976            | 0.05051      | 4.21496       | 2.53807            |
| S4 2.BO3  | 8.57005               | 18.0333                 | 4.12668          | 23.0769               | 17.2422            | 6.14582      | 18.2824       | 4.27846            |
| S4 2.BO4  | 11.3625               | 12.7004                 | 0.82107          | 11.8199               | 5.13626            | 2.40781      | 7.63962       | 2.6831             |
| S4 2.CO1  | 53.7795               | 49.9692                 | 8.04009          | 42.7767               | 15.0823            | 2.08789      | 17.8609       | 4.78608            |
| S4 2.CO3  | 1.73327               | 13.0395                 | 2.00469          | 11.0694               | 6.1409             | 1.68379      | 1.00105       | 0.65265            |
| S4 2.CO4  | 10.8329               | 39.6732                 | 7.95479          | 34.7092               | 28.1678            | 8.11584      | 2.37092       | 3.84336            |
| S4 2.EO5  | 17.6216               | 16.1837                 | 3.40158          | 16.1351               | 9.48135            | 6.23001      | 6.00632       | 1.81291            |
| S6 1.2BO4 | 14.5402               | 12.9162                 | 6.0354           | 52.1576               | 26.9496            | 7.44233      | 33.7197       | 4.20595            |
| S6 2.AO1  | 47.2316               | 24.0136                 | 1.55684          | 30.5816               | 9.29298            | 3.50227      | 18.177        | 1.23278            |
| S6 2.DO5  | 4.91093               | 4.68557                 | 0.76775          | 8.25516               | 4.42044            | 0.94292      | 16.4384       | 0.94271            |
| S6 2.EO4  | 3.08137               | 7.3058                  | 0.9277           | 25.3283               | 8.89112            | 1.33019      | 99.8419       | 27.0486            |
| S6 2.GO4  | 4.28503               | 7.18249                 | 3.8601           | 26.6417               | 15.6348            | 4.17579      | 4.58377       | 3.91588            |
| S7 2.BO3  | 11.6033               | 100                     | 100              | 79.1745               | 100                | 100          | 15.0685       | 30.0218            |
| S7 2.DO2  | 18.103                | 69.5129                 | 39.0168          | 52.1576               | 69.3457            | 60.3637      | 22.1286       | 100                |
| S8 2.2EO3 | 43.1873               | 59.9877                 | 22.4355          | 100                   | 8.94135            | 24.1792      | 76.3962       | 20.7397            |
| S8 2.EO2  | 2.5999                | 21.7633                 | 6.41928          | 12.0075               | 15.346             | 6.0953       | 7.74499       | 8.41189            |
| C1 1.2AO6 | 41.573                | 49.6763                 | 56.1437          | 15.9341               | 12.4146            | 56.2426      | 43.6546       | 0.98093            |
| C1 1.2BO5 | 14.6067               | 15.4797                 | 39.1304          | 6.73077               | 40.3189            | 16.0523      | 16.0611       | 32.4251            |
| C1 1.2FO4 | 9.39734               | 6.8864                  | 17.7694          | 21.2912               | 38.3827            | 14.3876      | 13.7967       | 32.6431            |
| C1 1.2GO4 | 14.096                | 24.9559                 | 50.2836          | 4.12088               | 17.0843            | 13.7931      | 19.5366       | 54.2234            |
| C1 1.3AO2 | 31.5628               | 53.2078                 | 14.1777          | 9.47802               | 13.6674            | 22.9489      | 6.26646       | 3.43324            |
| C1 1.3BO2 | 7.55873               | 6.94526                 | 10.586           | 3.15934               | 29.6128            | 4.87515      | 7.31964       | 18.4196            |
| C1 1.3CO4 | 6.94586               | 2.5309                  | 3.21361          | 1.92308               | 23.4624            | 1.30797      | 3.21222       | 0.32698            |

|           |         |         |         |         |         |         |         |         |
|-----------|---------|---------|---------|---------|---------|---------|---------|---------|
| C1 1.FO5  | 100     | 97.2337 | 100     | 43.8187 | 56.3781 | 78.9536 | 100     | 0.54496 |
| C1 2.2CO4 | 4.59653 | 14.538  | 1.51229 | 2.06044 | 6.60592 | 2.25922 | 1.36914 | 1.03542 |
| C1 2.2FO3 | 2.24719 | 32.0188 | 5.48204 | 2.74725 | 14.123  | 1.66468 | 0.52659 | 0.54496 |
| C1 2.CO6  | 26.2513 | 41.7304 | 5.10397 | 4.53297 | 20.615  | 3.9239  | 4.73934 | 1.08992 |
| C1 2.DO5  | 23.5955 | 33.1371 | 2.45747 | 2.74725 | 13.5535 | 2.14031 | 4.73934 | 0.76294 |
| C1 2.GO4  | 1.73647 | 2.17775 | 2.0794  | 0.13736 | 1.13895 | 0.35672 | 0.31596 | 0.21798 |
| C3 1.GO6  | 5.2094  | 2.47204 | 1.32325 | 4.67033 | 19.1344 | 6.77765 | 0.42127 | 0       |
| C4 2.2DO1 | 8.27375 | 7.76928 | 4.7259  | 6.31868 | 12.9841 | 5.11296 | 4.94997 | 6.32153 |
| C5 1.CO5  | 11.0317 | 34.3732 | 97.7316 | 63.4615 | 100     | 100     | 26.6456 | 42.5613 |
| C5 1.FO1  | 1.43003 | 1.35374 | 3.40265 | 0.82418 | 5.80866 | 1.66468 | 0.47393 | 0.43597 |
| C5 1.GO2  | 0.91931 | 0       | 2.83554 | 0.68681 | 3.18907 | 1.78359 | 0.47393 | 0.38147 |
| C5 1.GO5  | 0.91931 | 0.41201 | 2.0794  | 0.54945 | 2.2779  | 1.42687 | 0.10532 | 0.0545  |
| C6 1.CO1  | 1.73647 | 2.11889 | 5.48204 | 4.94505 | 46.3554 | 4.75624 | 0.78989 | 0.92643 |
| C6 1.GO4  | 1.83861 | 0.88287 | 0.56711 | 1.51099 | 10.2506 | 1.30797 | 0.42127 | 0.16349 |
| C6 2.2CO6 | 28.8049 | 37.1395 | 44.8015 | 75.2747 | 8.76993 | 45.1843 | 54.1864 | 0.32698 |
| C6 2.CO1  | 4.39224 | 2.47204 | 4.7259  | 6.31868 | 42.8246 | 7.13436 | 1.73776 | 1.08992 |
| C6 2.DO1  | 15.4239 | 32.0188 | 36.1059 | 100     | 77.1071 | 62.1879 | 64.0864 | 100     |
| C6 2.DO2  | 4.18795 | 3.29606 | 5.48204 | 8.1044  | 49.4305 | 6.06421 | 1.36914 | 1.47139 |
| C7 2.DO2  | 0       | 0.76516 | 1.13422 | 0       | 3.53075 | 0.35672 | 0       | 0.10899 |
| C7 3.AO5  | 28.907  | 45.7916 | 25.7089 | 37.7747 | 13.2118 | 19.3817 | 18.0621 | 23.8147 |
| C7 3.CO2  | 37.3851 | 61.9776 | 62.949  | 29.9451 | 68.1093 | 39.8335 | 11.1111 | 43.3243 |
| C8 1.2GO2 | 2.14505 | 6.82755 | 18.7146 | 3.57143 | 38.3827 | 6.42093 | 0.2633  | 0.38147 |
| C8 2.FO2  | 59.7549 | 100     | 55.5766 | 75.8242 | 87.5854 | 68.1332 | 82.991  | 93.951  |

### H3N2 rHA-specific antibodies

| Antibody  | A/Wisconsin/67/05 | A/Uruguay/716/07 | A/Hong Kong/1/68 | A/Panama/2007/99 |
|-----------|-------------------|------------------|------------------|------------------|
| S2 2.BO4  | 3.09563           | 3.27186          | 5.7903           | 27.0408          |
| S2 3.8CO3 | 19.7347           | 38.9054          | 0.15649          | 7.14286          |
| S2 3.9CO5 | 9.56329           | 8.26889          | 0.93897          | 8.67347          |
| S2 3.DO2  | 21.7247           | 40.8685          | 2.66041          | 82.1429          |
| S3 2.GO6  | 23.8806           | 23.26            | 66.5102          | 73.4694          |
| S3 3.BO6  | 40.5196           | 49.7323          | 100              | 100              |
| S4 2.AO5  | 6.02543           | 2.32005          | 1.09546          | 19.898           |
| S4 2.DO1  | 21.1719           | 7.1981           | 2.03443          | 38.7755          |
| S4 2.EO2  | 42.7861           | 28.7329          | 24.2567          | 85.7143          |
| S4 2.EO4  | 6.19127           | 3.39084          | 2.19092          | 87.7551          |
| S5 3.5CO1 | 13.7645           | 23.9738          | 1.09546          | 10.7143          |
| S6 1.BO1  | 15.9204           | 4.52112          | 10.0156          | 37.7551          |
| S6 3.3EO6 | 22.6092           | 44.5568          | 1.09546          | 45.9184          |
| S7 2.EO2  | 11.1111           | 2.85544          | 12.2066          | 28.5714          |
| S8 1.GO5  | 8.56827           | 4.28316          | 11.2676          | 24.4898          |
| S8 2.BO3  | 58.3748           | 43.843           | 51.4867          | 92.3469          |

|           |         |         |         |         |
|-----------|---------|---------|---------|---------|
| S9 3.2BO3 | 100     | 100     | 5.32081 | 30.102  |
| S9 3.3CO1 | 4.69873 | 6.78168 | 11.1111 | 43.8776 |
| C1 1.2AO2 | 80.3993 | 51.9953 | 100     | 84.0909 |
| C1 1.3BO1 | 9.2559  | 2.23005 | 9.39335 | 2.27273 |
| C1 1.3EO3 | 5.80762 | 3.40376 | 5.28376 | 1.62338 |
| C1 1.BO1  | 14.3376 | 10.2113 | 10.5675 | 13.961  |
| C1 1.CO2  | 45.5535 | 38.8498 | 1.76125 | 100     |
| C1 1.DO5  | 17.2414 | 7.39437 | 10.1761 | 8.11688 |
| C1 1.GO1  | 7.6225  | 3.75587 | 10.3718 | 2.5974  |
| C1 2.2FO4 | 84.9365 | 100     | 12.7202 | 35.7143 |
| C1 2.EO5  | 23.2305 | 22.4178 | 51.272  | 12.6623 |
| C1 3.7CO2 | 10.7078 | 1.52582 | 0.78278 | 2.5974  |
| C1 3.7FO2 | 19.9637 | 10.2113 | 38.1605 | 56.8182 |
| C2 2.2GO5 | 29.5826 | 16.6667 | 31.3112 | 46.4286 |
| C2 3.FO4  | 16.8784 | 34.8592 | 0.19569 | 30.1948 |
| C3 2.3CO1 | 4.17423 | 1.64319 | 0.97847 | 2.5974  |
| C3 2.3FO2 | 100     | 2.58216 | 0.19569 | 18.1818 |
| C6 1.CO4  | 3.81125 | 0.70423 | 0.78278 | 3.24675 |
| C6 2.2EO5 | 13.2486 | 7.74648 | 2.93542 | 5.51948 |
| C6 2.BO1  | 4.35572 | 1.29108 | 0.39139 | 1.94805 |
| C6 3.BO2  | 4.35572 | 5.75117 | 1.17417 | 7.79221 |
| C8 1.2AO2 | 15.245  | 8.4507  | 6.45793 | 13.961  |
| C8 1.2CO3 | 18.6933 | 5.16432 | 2.73973 | 9.74026 |
| C8 1.2EO6 | 12.5227 | 4.57746 | 4.10959 | 6.16883 |
| C8 1.BO2  | 30.3085 | 5.28169 | 3.5225  | 10.3896 |

\* Values shown here were used to plot S3 Fig. The values were normalized on a scale of 0-100% against an internal control for each strain to obtain relative level of binding of each antibody.
